# Supplementary material for: A genome-wide genetic screen uncovers determinants of human pigmentation
Source: PubMed Central journal article supplement (PMC10901463; doi:10.1126/science.ade6289), 2023-08-11
Supplement: NIHMS1964433-supplement-Supplementary_Material.pdf [file NIHMS1964433-supplement-Supplementary_Material.pdf]

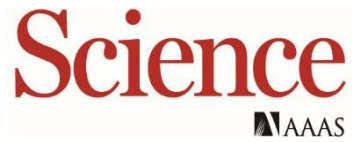

## Supplementary Materials for

### **A genome-wide genetic screen uncovers determinants of human pigmentation**

Vivek K. Bajpai *et al.*

Corresponding author: Joanna Wysocka, [wysocka@stanford.edu](mailto:wysocka@stanford.edu)

*Science* **381**, eade6289 (2023)  
DOI: 10.1126/science.ade6289

#### **The PDF file includes:**

Materials and Methods  
Figs. S1 to S10  
References

#### **Other Supplementary Material for this manuscript includes the following:**

Tables S1 to 10  
MDAR Reproducibility Checklist

## Materials and Methods

### 35 Cell culture

All cells were routinely tested for mycoplasma contamination using MycoAlert detection kit (Lonza, Cat# LT07-318).

### 40 Pluripotent stem cells (PSC) culture

The SOX10::GFP reporter H9 human embryonic stem cells (hESC) were initially cultured on mouse embryonic feeder cells as described previously (65) and gradually adapted to feeder-free culture. H9 hESC SOX10::GFP reporter line and H20961 human induced pluripotent stem cells (iPSCs) were cultured in feeder-free, serum-free medium mTESR-1 (Stem Cell technologies, Cat# 85850). Both pluripotent stem cells (PSC) i.e. H9-hESC SOX10::GFP reporter and H20961 iPSC were passaged ~1:6 every 4-5 days by incubation in ReLeSR (StemCell technologies, Cat# 05872) for 1 min at room temperature. The ReLeSR was then aspirated and the culture plates were incubated for 6-7 mins at 37°C. mTESR-1 was added to the cells and the plates were gently tapped to detach the cells, which were triturated and re-plated on tissue culture dishes coated overnight with growth-factor-reduced Matrigel (Corning, Cat# 356231).

### PSC differentiation into melanocytes

55 The SOX10::GFP reporter H9 hESC and H20961 iPSCs were differentiated into melanocytes following a previously published protocol with some modifications (14). Cells were plated on Matrigel coated plates in mTESR-1 medium and when colonies reached 70% confluency, the medium was changed to differentiation medium composed of KSR medium (1x knockout DMEM (Gibco, Cat# 10829018), 15% knockout serum replacer (Gibco, Cat# 10828028), 1x Antibiotic-Antimycotic (Gibco, Cat# 15240062) 1x MEM Non-Essential Amino Acids Solution (Gibco, Cat# 11140076), 1x Glutamax (Life Technologies, Cat# 35050061), 55 mM 2-mercaptoethanol (Gibco, Cat# 21985023) containing 10 µM SB431542 (Selleck Chemicals, Cat# S1067) and 500nM LDN193189 (Selleck Chemicals, Cat# S2618) for 48 hours with medium change every 24 hours. After 48 hours, in the above medium, 3 µM CHIR99021 (Selleck Chemicals, Cat # S2924) was added. After 72 hours, cells were fed with KSR media containing 10 µM SB431542 and 3 µM CHIR99021. On day 4 (after 96 hours), cells were fed with 75% KSR medium, 25% N2 medium plus 3 µM CHIR99021. The N2 medium is comprised of: 1x DMEM-F12 (Gibco, Cat# 11320033), 1x N2 NeuroPlex supplement (Gemini Bio, Cat# 400-163), 5.76 x 10<sup>-5</sup> mg/ml progesterone (Sigma, Cat# P7556), 1.55 mg/ml D-glucose (Sigma, Cat# G7021), 1x 55 mM 2-mercaptoethanol, 1x antibiotic-antimycotic. On day 6, cells were fed with 50% KSR, 50% N2 media containing 3 µM CHIR99021 plus 25 ng/ml BMP4 (BioVision, Cat# 4578) and 100 nM endothelin-3 (Alfa Aesar, Cat# J66312). On day 8, media was switched to 25% KSR media, 75% N2 media plus 3 µM CHIR99021, 25 ng/ml BMP4, and 100 nM EDN3. On day 10, cells were fed with 100% N2 media containing 3 µM CHIR99021, 25 ng/ml BMP4, and 100 nM EDN3. On day 11, cells were treated with Accutase (Sigma, Cat# A6964) for 30 mins and washed twice with neurobasal medium (Life Technologies, Cat# 21103049), counted, resuspended at a concentration of 2x10<sup>6</sup> cells/ml and plated on poly-L-ornithine (Sigma, Cat# P4638), laminin (Life Technologies, Cat# 23017015), and fibronectin (Fisher Scientific, Cat#

FC01010MG) coated dishes as 20  $\mu$ l volume droplets. Droplets were incubated at 37°C for 20 mins followed by the addition of MEL medium (50% neurobasal, 30% low glucose DMEM (Life Technologies, Cat# 11885084), 20% MCDB201 (Sigma, Cat# M6770), 1x antibiotic-antimycotic, 1x Glutamax, 1x ITS supplement (Corning, Cat# 354352), 100 $\mu$ M ascorbic acid (Sigma, A4403), 50ng/ml cholera toxin (Sigma, Cat# C8052), 50ng/ml Stem Cell Factor (Fisher Scientific, Cat# 50276388), 50nM dexamethasone (Sigma, Cat# D4902), 100nM EDN3, 2% Gem21 Neuroplex (Gemini Bio, Cat# 400-160), 3  $\mu$ M CHIR99021, 4ng/ml FGF2 (PeproTech, Cat# 100-18B), 500 $\mu$ M dbcAMP (Sigma, Cat# D0627), 25ng/ml BMP4. MEL medium was changed every 3 days and cells were passed every 5-6 days. Cells started showing pigmentation past day 25 of differentiation. As the cells differentiated from melanoblasts to the melanocytes state, cells were analyzed for side scatter (SSC) changes by FACS, as well as melanin quantification by measuring OD at 400 nm and comparing against a standard curve generated using synthetic melanin.

#### Primary human melanocytes culture

Foreskin tissues were procured from 1-2 day-old newborn males of diverse ethnicity following Institutional IRB protocol guidelines. Skin tissues were processed as described previously (66). Briefly, tissues were washed 3 times with 1x PBS (Gibco, Cat# 14040216), cut into pieces (~5mm $\times$ 5mm). A piece was fixed in 10% neutral buffered formalin and provided to the Stanford Pathology Core for Fontana-Masson staining. The rest of the tissue was enzymatically digested with dispase I (Zen-Bio, Cat# DISP1) for 15-20 hours at 4°C. Afterwards, the epidermis was peeled from the dermis manually using fine forceps. The epidermis was treated with trypsin-EDTA (Corning, Cat# 25053CI) for 15-20 mins at 37°C with intermittent trituration. The cell suspension was neutralized using soy trypsin neutralizing solution (Life Technologies), filtered through a 70  $\mu$ m cell strainer (ThermoFisher Scientific, Cat# 22363548), centrifuged at 200g for 5 min, and cultured in the presence of serum-free medium 254 (ThermoFisher Scientific, Cat# M254500) supplemented with 1x human melanocyte growth supplement (HMGS) (ThermoFisher Scientific, Cat# S0025) for 72 hours without medium change. Afterwards, fresh medium was replenished every other day.

#### Melanoma cell line culture

MNT-1 cells were cultured in high glucose DMEM (Life Technologies, Cat# 11995040) supplemented with 10% fetal bovine serum (Life Technologies, Cat# 16000069), 1x antibiotic-antimycotic and 1x Glutamax.

#### **Plasmids, SpCas9 expression, gene knockout and rescue cell lines generation**

Pb-TRE3G-SpCas9-IRES-Blast (Addgene# 195506), a piggyBac doxycycline inducible SpCas9 expression vector (see image below), initially generated in the Wysocka laboratory, was used in this study.

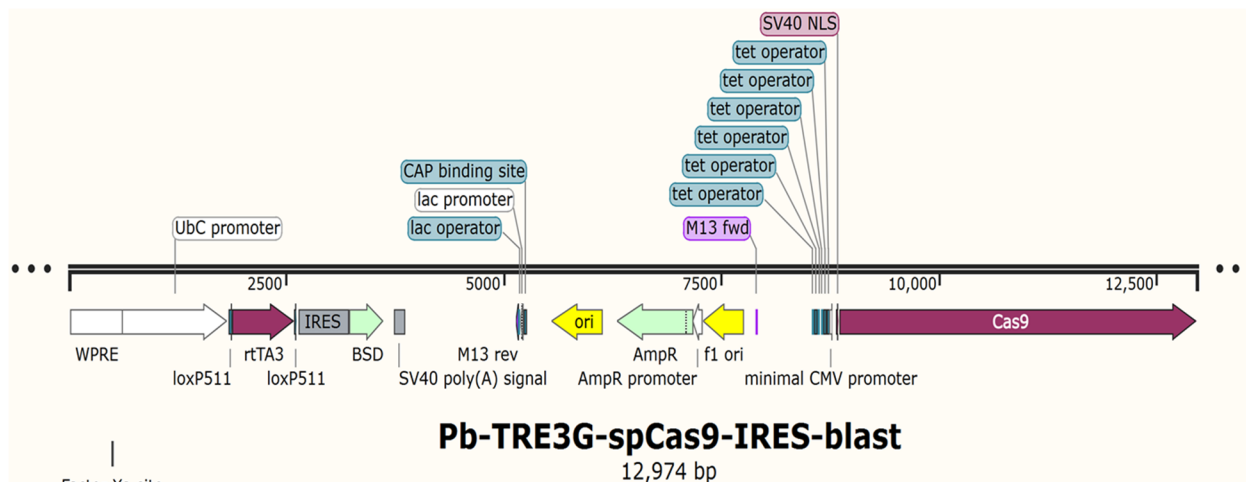

Map of Pb-TRE3G-SpCas9-IRES-blast plasmid

125 This plasmid efficiently expressed SpCas9 under a doxycycline inducible promoter and contained a blasticidin selection cassette. The plasmid was subsequently used for creating the Cas9-MNT-1 cell line that was used for both genome-wide screening and screen hit validation experiments. To generate the Cas9-MNT-1 cell line, MNT-1 cells were transfected with Pb-TRE3G-SpCas9-IRES-Blast and piggyBac transposase (PB210PA-1, System Biosciences) in a 1:3 ratio using Lipofectamine 2000 (Life Technologies, Cat# 11668019) following the manufacturer's instructions. Cells were selected with 5µg/ml blasticidin (InvivoGen, Cat# ant-bl-1) treatment for a week. Afterwards, single cells were plated to generate a clonal cell line and efficient induction of SpCas9 nuclease from the clonal cell line was confirmed by western blot.

130 In the screen hit validation experiment, the Pb459-U6-sgRNA-EF1a-PuroR vector (Addgene # 195507) used for sgRNA expression in the Cas9-MNT-1 cells was designed in two steps. First, the lentiviral backbone of the pMCB320 vector was replaced with the piggyBac backbone from the PB-TRE-dCas9-VPR (Addgene, 63800) vector using EcoRI (NEB) and XbaI (NEB) restriction enzymes. Next, PuroR-T2A-mCherry was replaced with the PuroR cassette using NheI (NEB) and EcoRI (NEB). Pairs of oligonucleotides carrying sgRNA sequences (see table below) and the BlnI (NEB) and BstXI (NEB) overhangs were phosphorylated and annealed. The annealed oligos were subsequently ligated into the BlnI and BstXI digested, and gel purified, Pb459-U6-sgRNA-EF1a-PuroR backbone.

135  
140

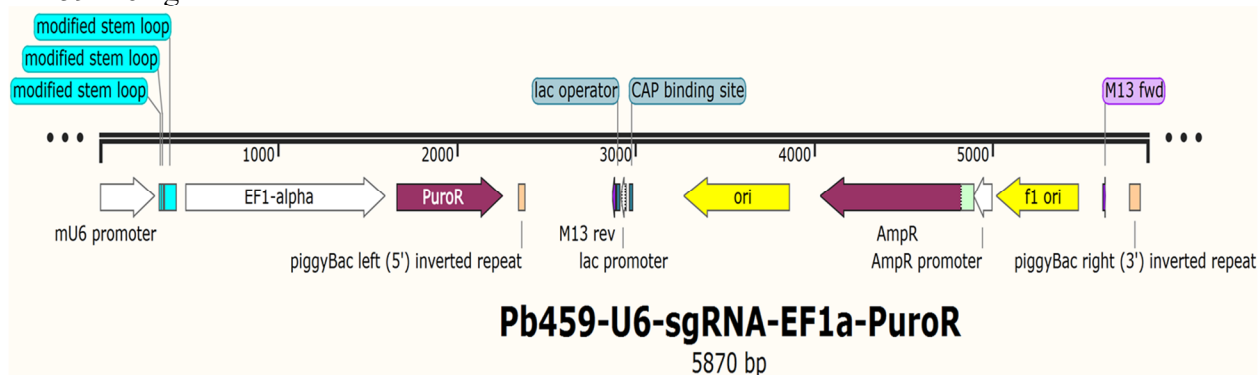

Map of Pb459-U6-sgRNA-EF1a\_PuroR plasmid

145

**Table** sgRNA sequences used for knockout experiments.

| <b>Gene</b>                 | <b>sgRNA sequence</b> |
|-----------------------------|-----------------------|
| <i>API-G1</i>               | GCTCCCGCAATCTGATGG    |
| <i>API-G2</i>               | GGGTTCGGGCTGTCCGGA    |
| <i>API-G3</i>               | GACAATACATACCGATGT    |
| <i>CCDC22-G1</i>            | GCAGGGTTGATCACACGC    |
| <i>CCDC22-G2</i>            | GTCTGCCCGGTTCCGCC     |
| <i>CCDC22-G3</i>            | GGGCTATCCCTTGGAGCT    |
| <i>COMMD3-G1</i>            | GCGGGGATCCGCCAGCATC   |
| <i>COMMD3-G2</i>            | GTACATCCTATGAAGTTGAT  |
| <i>COMMD3-G3</i>            | GATCTCTCCCTCATATAA    |
| <i>Control-G1</i>           | GTCATACATGTATTTGGA    |
| <i>Control-G2</i>           | GACAAGAAAAACCACTTA    |
| <i>Control-G3</i>           | GATACTAATCAATAAGTGGG  |
| <i>KHDRBS1-G1</i>           | GGCGTCTGACGCACCGAG    |
| <i>KHDRBS1-G2</i>           | GGGTCCCAGCGCAGAGT     |
| <i>KHDRBS1-G3</i>           | GGGCCGTAGCGGCTCCA     |
| <i>KLF6-G1</i>              | GGAGGTAAACTTGGCCGT    |
| <i>KLF6-G2</i>              | GCCGGTCTCGTGCACGATC   |
| <i>KLF6-G3</i>              | GCTGTCAAATTTGATTTCTG  |
| <i>SLC12A9-G1</i>           | GCGAGAGCTCACCTCTGC    |
| <i>SLC12A9-G2</i>           | GGCGACGATCGTGCCAG     |
| <i>SLC12A9-G3</i>           | GCAGGACATAGACGAAGA    |
| <i>SLC33A1-G1</i>           | GCCGGCTGCTGTCCCTTGT   |
| <i>SLC33A1-G2</i>           | GGA CTCAGCGGGCCGGGA   |
| <i>SLC33A1-G3</i>           | GCAAATGCTGCTTAGTT     |
| <i>TYR-G1</i>               | ATTGTCTGTAGCCGATTGG   |
| <i>TYR-G2</i>               | GCTGTCCACCGTGGAGCG    |
| <i>TYR-G3</i>               | GTGCTCTGGCAACTTCAT    |
| <i>TYR-G4</i>               | GAGGAGACACAGGCTCTA    |
| <i>WASHC4 (KIAA1033)-G1</i> | GGTGATTGCCAAATTCAAAT  |
| <i>WASHC4 (KIAA1033)-G2</i> | GCGAGCCGTCGTCAACG     |
| <i>WASHC4 (KIAA1033)-G3</i> | GTACGAATGATAAGATCTGG  |
| <i>WDR81-G1</i>             | GCAGGCAGATGAGGGCGATG  |
| <i>WDR81-G2</i>             | GTCGCAACCCTGCCAGCG    |
| <i>WDR81-G3</i>             | GACGTCAGCAGGCGGAGC    |

150 After cloning the Pb459-U6-sgRNA-EF1a-PuroR vector expressing unique sgRNAs, Cas9-MNT-1 cells were transfected with Pb459-U6-sgRNA-EF1a-PuroR and piggyBac transposase (PB210PA-1, System Biosciences) in a 1:3 ratio using Lipofectamine 2000 following manufacturer's instructions. Transfected cells were selected with 1µg/ml puromycin treatment for 4-6 days. Afterwards, cells were treated with 2µg/ml doxycycline (Sigma, Cat# D5207) for 2 weeks followed by cell lysis, melanin quantification, and FACS analysis on FACS Aria (BD)/

155 CytoFLEX (BD) for SSC measurements. FACS analyses were done using FlowJo software (BD) and flowCore() package in R.

To generate the *TYR* expression plasmid used in the tyrosinase rescue studies, a wild copy of the *TYR* gene was PCR amplified from the pEGFP-*TYR* plasmid (Addgene # 32781) with *NheI* and *AgeI* overhangs. The amplicon was then digested and ligated to the already digested and gel purified PB-TRE-dCas9-VPR plasmid (Addgene, 63800) backbone. The resulting vector Pb-TRE3G-*TYR*-HygR (Addgene # 195508) (see image below) contained the *TYR* cassette under the doxycycline inducible TRE3G promoter and also contained a hygromycin selection cassette.

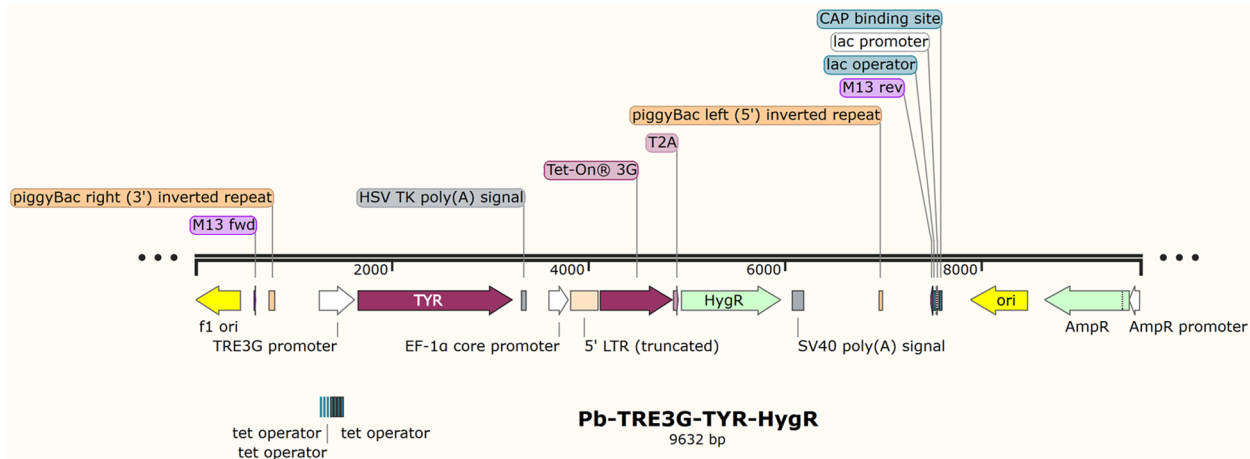

165 Map of Pb- TRE3G-*TYR*-HygR plasmid

*TYR-G1-G4* knockout cell lines were transfected with the Pb-TRE3G-*TYR*-HygR plasmid and piggyBac transposase (PB210PA-1, System Biosciences) in a 1:3 ratio using lipofectamine following the manufacturer's instructions. Cells were selected with 40µg/ml hygromycin (InvivoGen, Cat# ant-hg-1) for a week followed by 2µg/ml doxycycline treatment for a month to re-express *TYR* on *TYR* knockout cell lines. Afterwards, cells were lysed for melanin quantification and SSC measurements.

175 Lentiviral *COMMD3* and *RAP2A* expression

Lentiviral *RAP2A* overexpression plasmid (pCHA1.1-Rap2a-V5) was purchased from Addgene (#149509). Blasticidin cassette was replaced with hygromycin selection cassette using *BstXI* and *KpnI* restriction enzymes to generate pCHA1.1-Rap2a-V5-hygro vector (Addgene # 195510). A *COMMD3* coding sequence (*COMMD3*\_NM\_012071.4) was PCR amplified using forward (ataGCTAGCATGGAGCTCTCGGAGTCTG) and reverse (ataGCGGCCGCTTACAACACTGAGTTGCTCTTTCC) primers and cloned into a pCHA1.1-Rap2a-V5-hygro vector using *NheI* and *NotI* restriction sites to generate pCHA1.1-*COMMD3*\_CDS-V5-hygro (Addgene# 195509). These two plasmids were packaged into a lentivirus as described earlier (65). *COMMD3-KO* and *WT* (control sgRNA edited) clonal lines were generated by plating single cells of bulk *COMMD3-KO* and *WT* (Control-edited) cell populations. Multiple clones were screened for biallelic deletions and confirmed by western blot for *COMMD3* using anti-*COMMD3* antibody (Bethyl Laboratories, A304-092A).

190 Endogenous tagging of KLF6 locus with FKBP12<sup>F36V</sup> and V5

For endogenous tagging of KLF6 at the c-terminus, a dsDNA gene block containing tandem FKBP12<sup>F36V</sup> and V5 epitope tags was purchased from IDT. The upstream and downstream homologous sequences to the c-terminus of KLF6 were amplified using the following primers:

195 aactccatcactaggggttccggcggccgcCCGGCAGGCTGACACCTCATCCCGCAAGCA,  
tctctggggagatggtttccacctgcactccGAGGTGCCTCTTCATGTGCAGGGCCAGGTG,  
CACCTGGCCCTGCACATGAAGAGGCACCTCggagtgacagtgaaaccatctccccagga,  
GCCTACAGGATCCACCTCTCTGCTCCCTCAggaaccggatccagagcctgaaccggaggt,  
acctccggttcaggctctggatccggttccTGAGGGAGCAGAGAGGTGGATCCTGTAGGC,  
200 aactccatcactaggggttctctgcccgcAATTCAAATTCAGAATCATTTAAAAATAAT. These  
sequences were cloned into an AAV6 donor vector (67) (a gift from Matthew Porteus, Stanford  
University) using Gibson assembly. 293T cells were transfected with plasmids mixed in a 3:1:1  
ratio (AD5 helper plasmid: rAAV transgene transfer plasmid: Capsid DJ plasmid). 72 hours post  
transfection, 293T cells were collected and AAV particles were purified using AAVpro  
205 Purification Kit Midi (Takara Bio, Cat# 6675). A chemically modified sgRNA  
(CACAUAAAGAGGCACCUCUG) targeting the c-terminus of KLF6 was purchased from  
Synthego (CRISPRevolution sgRNA EZ Kit, Synthego). sgRNA and Cas9 (Integrated DNA  
Technologies) were mixed per manufacturer's recommendations to assemble a ribonucleoprotein  
(RNP) complex. MNT-1 cells were nucleofected with KLF6 sgRNA-Cas9 RNP using the Amaxa  
210 electroporator (Lonza) with the U-24 program. Nucleofected cells were plated in MNT-1 cell  
culture medium containing AAV6 donor HDR templates. Single cell colonies were grown,  
genomic DNA was isolated, the desired region was PCR amplified, and the sequence was  
verified by Sanger sequencing. Thus, derived homozygous and heterozygous tagged clonal lines  
were tested for their ability to degrade KLF6 upon dTAG-13 or dTAG<sup>v</sup>-1. Clonal cells were  
215 treated with 500nM dTAG<sup>v</sup>-1 or 500nM dTAG-13 for 24 hours, as well as DMSO vehicle  
control and subsequently, protein lysate was collected. Western blot using anti-V5 tag antibody  
(Abcam, ab15828) was used to confirm KLF6 depletion.

220 **Total cellular melanin quantification**

Total melanin quantification was done as described previously (68). For primary human melanocytes and PSC-derived melanocytes, 2.5x10<sup>5</sup> cells were counted, centrifuged at 4000xg for 5 min and washed twice with PBS. Then the cell pellet was dissolved in 250 μl 1M NaOH with 10% dimethyl sulfoxide (DMSO). For the MNT-1 melanoma cell line, 6.0x10<sup>5</sup> cells were dissolved in 120μl 1M NaOH with 10% dimethyl sulfoxide (DMSO). Cell lysate was incubated at 80°C for 2 hours. Afterwards, 100 μl of lysate was placed in a 96 well plate to measure absorbance at 400 nm wavelength on an Infinite 200 Pro plate reader (Tecan). A standard curve was generated using synthetic melanin (Sigma) and melanin concentration was determined by reading OD 400 nm against the standard curve (69).

230 **Immunocytochemistry and Imaging**

Immunocytochemistry was performed as described previously (66). Briefly, cells were fixed in 4% paraformaldehyde, permeabilized with PBS with 0.1% Triton X-100 and blocked with 1%BSA/0.01% Triton X-100. Afterwards, cells were incubated with one of the following anti-

235

human primary antibodies diluted in blocking buffer: goat PAX3 (1:100; 4°C overnight; Santa Cruz, sc-34916), mouse TYRP1 (MEL-5) (1:500; 4°C overnight; BioLegend, 917801), rabbit MITF (1:200; 4°C overnight; Abcam, ab59232), goat SOX10 (1:50; 4°C overnight; Santa Cruz, sc-17342), mouse HMB45 (1:20; 4°C overnight; Life Technologies, 081050), ATP7A (1:100; 4°C overnight; Santa Cruz, sc-376467). Afterwards, cells were incubated with anti-mouse or anti-goat Alexa Fluor 488 and Alexa Fluor 594 antibodies (1:400; 1 hr at RT; Invitrogen) and counter-stained with DAPI nuclear dye (0.5 µg/ml in PBS; 10 min; Sigma). Cells incubated with secondary antibodies alone served as negative controls. Images were acquired on either an inverted microscope (Nikon Ti2) or on a confocal microscope (Leica TSC SP2). For human and mouse tissue histology, tissues were fixed in 10% neutral buffered formalin and Fontana-Masson and hematoxylin & eosin staining were performed at the Stanford University Pathology Core facility.

### LysoTracker Red DND-99 labeling

For melanosomal LysoTracker dye labeling experiments, COMMD3-KO and WT (control-edited) cells were treated for 30 mins with medium containing 50nM LysoTracker Red DND-99 (Life Technologies, Cat# L7528). After 30 mins, cells were washed three times with PBS and fresh medium was replenished. Cells were imaged in a Nikon Spinning Disk Confocal Microscope at 100x/60x magnification. For Lysotracker Red and TYR co-staining experiments, a previously described protocol was followed (70). To this end, COMMD3-KO and WT (control-edited) cells were first treated with 50nM LysoTracker Red for 30 min, then fixed with 4% paraformaldehyde, permeabilized with PBS with 0.1% Triton X-100, and blocked with 1% BSA/0.01% Triton X-100. Afterwards, cells were incubated overnight with anti-TYR antibody (MyBioSource, MBS127217) diluted in blocking buffer. Next day, cells were washed and treated with Alexa Fluor 647 antibodies (1:400; 1 hr at RT; Invitrogen), counter-stained with DAPI nuclear dye (0.5 µg/ml in PBS; 10 min; Sigma), and imaged on a Nikon spinning disk confocal microscope at 100x or 60x magnification. Cells incubated with secondary antibodies alone served as negative controls.

### Colocalization analysis

Colocalization analysis of ATP7A and TYR co-immunostaining and LysoTracker Red and TYR co-staining were done using the JaCoP plugin in ImageJ (71). To this end, three clonal cell lines of COMMD3-KO and WT (control-edited) were stained as described above and images were acquired under identical conditions using a Nikon spinning disk confocal microscope. Each image was split in red (for LysoTracker Red) and green (TYR, Alexa Fluor 647, pseudo-colored as green) channels and converted to 8-bit grayscale images. A threshold of 60 was applied to both channels, and Manders' colocalization coefficients M1 (fraction of red fluorescence in areas with green fluorescence) and M2 (fraction of green fluorescence in areas with red fluorescence) were calculated. For each clone of COMMD3-KO and WT (control-edited), at least four of the analyzed images (total 12-13 images) included 90-100 cells for ATP7A and TYR co-immunostaining experiments and 120-130 cells for TYR and LysoTracker Red co-staining experiments.

M1 and M2 are defined in the following manner by Mander et al., (1993) (72):  $M1 = (\sum_i R_{i,col}) / \sum_i R_i$  where  $R_{i,col} = R_i$  if  $G_i > 0$  and  $R_{i,col} = 0$  if  $G_i = 0$  and  $M2 = (\sum_i G_{i,col}) / \sum_i G_i$  where  $G_{i,col} =$



285  $G_i$  if  $R_i > 0$  and  $G_{i,col} = 0$  if  $R_i = 0$ . Where  $R_i$  and  $G_i$  are the grayscale values of voxel  $i$  of the red channel and the green channel. The M2 coefficient, which measured the fraction of TYR positive melanosomes colocalized with ATP7A in the ATP7A and TYR co-immunostaining experiment is shown in Figure S10B. The M2 coefficient, which measured the fraction of TYR positive melanosomes colocalized with LysoTracker Red, indicative of acidic TYR positive melanosomes, is shown in Figure S10F.

### 290 Melanosome pH modulation

295 For melanosomal pH modulation experiments, we used vacuolar-type H<sup>+</sup>-ATPase (V-ATPase) proton pump inhibitors (bafilomycin A1 and concanamycin) as well as chloroquine, a weak base, which accumulates in endosomal organelles and raises their pH. Clonal COMMD3-KO or *WT* (control-edited) cell lines were treated with either 0.1  $\mu$ m bafilomycin A1 (BafA1), 0.1  $\mu$ m concanamycin (ConA), or 50  $\mu$ m chloroquine for 24 hours. Cells were treated with an equivalent amount of DMSO (for BafA1 and ConA) or H<sub>2</sub>O (for chloroquine) as well, which served as vehicle controls. Cells were then washed twice with PBS and medium was changed with fresh medium containing 50 nM LysoTracker Red dye for 30 min. Afterward, cells were washed three times with PBS and imaged under a Nikon spinning disk confocal microscope or analyzed in a FACSaria flow cytometer (BD Biosciences). In parallel, cells were treated as described above and lysed with 1M NaOH with 10% DMSO for total melanin quantification.

### 300 **Transmission electron microscopy**

305 Cells were cultured on ACLAR coverslips and fixed with 2% glutaraldehyde and 4% paraformaldehyde in 0.1M Sodium Cacodylate buffer, pH 7.4, for 1 hour at room temperature. Thin sections were cut and post-fixed with 1% Uranyl acetate. Sections were subsequently dehydrated, Epon-infiltrated, and examined with a JEOL JEM-1400 series Transmission Electron Microscope at the Stanford Cell Science Imaging Facility. TEM images were acquired for different gene knockouts as well as control-edited cells and melanosomes at various stages of maturation, i.e., stage I-IV were counted in a blinded experiment where the person doing the counting was unaware of the experiment design and expected outcome.

### 315 **Western blotting**

315 Cas9-MNT-1 cells were induced for 48 hours with 2  $\mu$ g/ml doxycycline to express the Cas9 nuclease. Afterwards, whole cell extracts were obtained by lysing cells in ice cold lysis buffer (300 mM NaCl, 100 mM tris (pH 8), 0.2 mM EDTA, 0.1% NP-40, 10% glycerol, 1 mM phenylmethylsulfonyl fluoride (PMSF), and protease inhibitor cocktail (complete mini, Roche Applied Sciences, Cat# 11836153001) for 20 mins at 4°C. The supernatant was collected, the protein concentrations determined by Bradford assay using Bradford reagent (Bio-Rad), and serial dilutions of proteins were separated on an SDS-polyacrylamide gel electrophoresis (SDS-PAGE) gel. Afterwards, proteins were transferred to nitrocellulose membranes and immunoblotted using mouse monoclonal Cas9 antibody (7A9-3A3, Cell Signaling Technology), mouse monoclonal anti-TYR antibody (Santa Cruz, sc-20035) HRP-conjugated rabbit monoclonal GAPDH antibody (D16H11, Cell Signaling Technology) and HRP-conjugated

mouse monoclonal anti-beta actin antibody (AC-15, Abcam). Protein bands were detected using the Lumi-Light (Roche) chemiluminescence kit as per the manufacturer's instructions.

### 330 Melanosome Immunoprecipitation

Melanosome Immunoprecipitation experiments were done as described earlier (32). To this end, MNT-1 cells were transduced with Melano-Tag (GPR143-mScarlet-3xHA, Addgene #160369) or Control-tag (GPR143-mScarlet-1xMyc, Addgene #160368) lentiviral vectors. Melano-Tag  
335 localizes on the melanosomal membrane and after gentle cell lysis, intact melanosomes can be immunoprecipitated using anti-HA magnetic beads. Cells transduced with the Control-tag and immunoprecipitated with anti-HA magnetic beads will serve as control. For Melanosome-IP experiments,  $10^7$  MNT-1 cells were plated per 15-cm plate and collected 3 days after plating. Cell culture medium was changed 2 h before cell harvesting. Cells were washed twice with ice  
340 cold PBS, collected by scraping in cold KPBS buffer (10 mM KH<sub>2</sub>PO<sub>4</sub>, 136 mM KCl, pH 7.25) and pelleted by centrifugation at 2,000g for 2 min at 4 °C. The cell pellet was resuspended in 200 µl cold KPBS buffer and 10 µl of the cell suspension was taken aside as input control. Cells were homogenized with a hand-held tissue grinder (VWR) for 30s. 800 µl of KPBS buffer was further added and the suspension was centrifuged at 3,000g for 2 min at 4 °C. Supernatants were then  
345 transferred into 1.5-ml tubes that contained 100 µl anti-HA magnetic beads (ThermoFisher Scientific, Cat# 88837) washed with KPBS buffer. The cell suspension was incubated with anti-HA magnetic beads for 10 mins at 4 °C with gentle rocking. Magnetic beads were washed 3 times with 1ml ice-cold KPBS, being transferred to a new collection tube after each wash. Immunoprecipitated and input samples were lysed in 50 µl lysis buffer containing 40 mM  
350 HEPES, pH 7.4; 1% Triton-X100; 2.5 mM MgCl<sub>2</sub>; 10 mM β-glycerol phosphate, 10 mM pyrophosphate, and Thermo Scientific Halt Protease Inhibitor (ThermoFisher Scientific, Cat# 78430). Immunoblotting on input and immunoprecipitated samples was done using antibodies for melanosomal markers PMEL (Santa Cruz, sc-377325) and LAMP2 (Santa Cruz, sc-18822), mitochondrial marker VDAC1 (Cell Signaling Technologies, #4461), as well as COMMD3  
355 (Bethyl Laboratories, A304-092A).

### Genome-wide CRISPR screen

MNT-1 cells were transfected using Lipofectamine 2000 with piggyBac transposase (PB210PA-1, System Biosciences) and a piggyBac plasmid expressing SpCas9 under a doxycycline inducible promoter and containing a blasticidin selection cassette. Clonal cells were selected with 5µg/ml blasticidin treatment for a week. These cells, termed Cas-MNT-1 cells, expressed SpCas9 upon doxycycline treatment and were used for the genome-wide CRISPR screen.  
360 The pMCB320 vector-based 10-sgRNA per gene CRISPR-Cas9 library base has been described previously (20). This library consists of nine sub-libraries containing ~ 200,000 guides targeting over 20,000 genes and 13,500 control guides. Control guides included non-targeting guides (i.e., no binding sites in the genome) and safe-targeting control guides targeting genomic locations with no annotated functions (20).

A large batch of nine CRISPR-Cas9 lentiviral sub-libraries was packaged using methods described previously with some modifications (65). Briefly, 293T packaging cells were  
370 transfected with CRISPR-Cas9 sub-libraries plasmid and a third-generation lentiviral packaging mix (1:1:1 mix of pMD2.G, pRSV-Rev, and pMDLg/pRRE) in a 1:1 ratio using

polyethylenimine. After 12 hours of transfection, fresh medium (high glucose DMEM plus 10% fetal bovine serum) was supplied to the 293T cells and subsequently two batches of lentivirus were collected at 24 hours and 48 hours. These two batches were combined, passed through a 0.45  $\mu\text{m}$  syringe filter (Millipore), ultracentrifuged (50,000 $\times$ g at 4C for 2 hours) and the viral pellet was resuspended in opti-MEM medium and stored in -80C until further use. Cas9-MNT-1 cells were transduced with serially diluted lentiviral sub-libraries and FACS analyzed for mCherry positive cells to determine transduction efficiency and multiplicity of infection (MOI) calculations. For two independent genome-wide screens, an MOI of 0.1 was used to infect  $\sim 200 \times 10^6$  Cas9-MNT-1 cells. Cells were selected with 1  $\mu\text{g}/\text{ml}$  puromycin for two weeks to achieve more than 90% mCherry positive cells and were then treated with 2  $\mu\text{g}/\text{ml}$  doxycycline for two weeks for Cas9 induction and subsequent gene editing. At this point, cells from the top and bottom 10% of the SSC distribution were FACS sorted on FACSaria cell sorters (BD). For each replicate,  $\sim 50 \times 10^6$  low SSC and  $\sim 50 \times 10^6$  high SSC fractions were sorted, totaling  $\sim 100 \times 10^6$  cells at 500 $\times$  coverage. Genomic DNA was isolated from  $200 \times 10^6$  cells using the QIAamp DNA blood midi kit (Qiagen, Cat# 51183) followed by DNA purification using the DNeasy PowerClean Pro Cleanup kit (Qiagen, Cat# 12997-50) to remove coprecipitated melanin following the manufacturer's instructions.

PCR amplification of inserted sgRNAs from the genomic DNA was done with the Herculase II Fusion DNA Polymerase (Agilent Technologies, Cat# 600679) using the primers oMCB-1562 and oMCB-1563. All of the genomic DNA was PCR amplified using the following PCR protocol: 1  $\times$  98 $^\circ\text{C}$  for 2 min, 18  $\times$  98 $^\circ\text{C}$  for 30 sec, 59.1 $^\circ\text{C}$  for 30 sec, 72 $^\circ\text{C}$  for 45 sec, 1  $\times$  72 $^\circ\text{C}$  for 3 min. Each PCR reaction included 300 ng of genomic DNA, 20  $\mu\text{L}$  5X Herculase buffer, 2.5  $\mu\text{L}$  of 10 mM dNTPs, 1  $\mu\text{L}$  100  $\mu\text{M}$  oMCB-1562, 1  $\mu\text{L}$  100  $\mu\text{M}$  oMCB-1563, 0.5  $\mu\text{L}$  Herculase II Fusion DNA polymerase, and water to make up the volume to 100  $\mu\text{L}$ . PCR amplicons from each PCR reaction for each group were pooled together and a second five step PCR reaction was set up for each group as follows: 5  $\mu\text{L}$  amplicon from PCR reaction 1, 20  $\mu\text{L}$  5X Herculase buffer, 2.5  $\mu\text{L}$  of 10 mM dNTPs, 1  $\mu\text{L}$  100  $\mu\text{M}$  oMCB-1439, 1  $\mu\text{L}$  100  $\mu\text{M}$  of a unique barcoded primer, 0.5  $\mu\text{L}$  Herculase II Fusion DNA polymerase, and water to make up the volume to 100  $\mu\text{L}$ . PCR conditions for the second PCR reaction were: 1  $\times$  98 $^\circ\text{C}$  for 2 min, 19  $\times$  98 $^\circ\text{C}$  for 30 sec, 59.1 $^\circ\text{C}$  for 30 sec, 72 $^\circ\text{C}$  for 45 sec, 1  $\times$  72 $^\circ\text{C}$  for 3 min. PCR amplicons from each group were pooled, and 50  $\mu\text{L}$  was run on a 1% TAE-agarose gel. PCR bands were excised and purified using a Qiagen Gel Purification Kit as per manufacturer's instructions. The sgRNA libraries were sequenced by deep sequencing on an Illumina Hi-Seq using the custom sequencing primer oMCB-1672. Computational analysis of the screen was done using the CasTLE maximum likelihood estimator, which utilizes the background of negative control guides RNAs as a null distribution model against which gene effect sizes, confidence scores, and *P* values are determined. We used safe-targeting guides as control guides in our analysis. The results of the screen are shown in table S1. We performed a search on a pigmentation database (6) in order to classify screen hits as either known or novel pigmentation genes. GO term enrichment analysis of CRISPR screen hits was performed using Gene ontology tools GOrilla (73) and REVIGO (74). Screen hits at 10% FDR were used as the input gene set in GOrilla for GO term enrichment analysis for biological processes and components. The enriched GO terms with FDR corrected *P* value  $< 0.05$  were then used in REVIGO to remove the redundant GO terms and generate xgmml graph files, which were used in Cytoscape software (v3.8.0) to visualize graphs (Fig. S3).

## Animal Studies

420 All animals' studies were approved by Stanford University IACUC. Animals were kept in 12  
light/12 dark cycle and had free access to food and water. B6.Cg-Tg(Tyr-cre)1Lru/J  
(RRID:IMSR\_JAX:029788) (51) and C57BL/6J (RRID:IMSR\_JAX:000664), mice were  
purchased from Jackson Labs, and  $Klf6^{fl/fl}$  (50) mice were a gift from Sandeep Mallipattu, Stony  
425 Brook University. For breeding, TyrCre females were kept with  $Klf6^{fl/fl}$  male in a cage, which  
gave TyrCre::  $Klf6^{fl/+}$  progenies in the first generation. TyrCre::  $Klf6^{fl/+}$  males and females were  
crossed again, which resulted in animals with genotypes  $Klf6^{fl/fl}$ , TyrCre::  $Klf6^{fl/fl}$ ,  $Klf6^{fl/+}$ ,  
TyrCre::  $Klf6^{fl/+}$ ,  $Klf6^{+/+}$ , TyrCre::  $Klf6^{+/+}$ , with expected Mendelian ratios. As the TyrCre  
transgene was inserted into the X chromosome (51) that gets randomly silenced in females, we  
430 used only male animals from this cross to examine the effects of  $Klf6$  deletion. Animals were  
genotyped by lysing tail tissue in 75  $\mu$ l buffer (25mM NaOH / 0.2 mM EDTA) at 98°C for 1  
hour. Then 75  $\mu$ l of 40 mM Tris HCl (pH 5.5) was added to this and samples were centrifuged at  
4000rpm for 3 minutes. A 1  $\mu$ l undiluted aliquot was used for a 25  $\mu$ l PCR reaction using  
DreamTaq polymerase (ThermoFisher Scientific, Cat# EP0701) with the following primers for  
TyrCre detection (CGGTTATTCAACTTGCACCA, AGTGGCCTCTTCCAGAAATG,  
435 TGC GACTGTGTCTGATTTC, TGATAGTCACTCCAGGGGTTG) and the following for  
 $Klf6^{fl/fl}$  detection (GTCTCTTGACACCTTGACTATCTCTCC,  
CAAGAAGCCTTCAGAGAACACC).

#### RNA-seq

440 Total RNA was isolated from  $1 \times 10^6$  primary melanocytes using an RNA isolation kit (Zymo  
Research, Cat# R2052) as per the manufacturer's instructions. mRNA was isolated using two  
rounds of Dynal oligo(dT) bead (Invitrogen, Cat# 61002) purification of 10ug total RNA. The  
mRNA was fragmented with 10X Fragmentation Buffer (Ambion, Cat# AM8740) for 5 minutes  
445 and purified afterwards. First strand cDNA synthesis was carried out using Random Hexamer  
Primers (Invitrogen, Cat# N8080127) and the SuperScript II enzyme (Invitrogen, Cat#  
18064014) followed by second strand cDNA synthesis with RNase H (Invitrogen, Cat# EN0201)  
and DNA Pol I (Invitrogen, Cat# 18010017). The cDNA was purified with a QIAquick column  
(Qiagen, Cat# 28104). Sequencing libraries were prepared using the Ovation Ultralow System  
450 (Nugen/Tecan, Cat# 9149-A01) following manufacturer's instructions. Sequencing adaptors  
were cleaned by magnetic bead (Agencourt XP, Cat# A63881) size selection. Libraries were  
QCed by Qubit and Bioanalyzer (Agilent) and multiplexed in six to eight samples per lane for  
single-end or paired-end sequencing on Illumina HiSeq 4000 or NEXTseq 500 platforms.

455 Reads were aligned to a hg38 genome model with hisat2 and an ab initio transcript discovery  
was performed using stringtie. These gene models were reconciled with human gencode 29 gene  
models using gffcompare. Read coverage over the models was obtained with featureCounts.  
Expression values as approximate TPMs were calculated at the transcript level without library  
fragment length correction and subsequently summed for each gene if multiple transcripts per  
gene were present. Log TPM + 1 expression values for 2216 most variable genes were used to  
460 calculate PCA for exploratory analysis. For gene expression (TPM) and melanin (OD 400 nm)  
correlation analysis, Spearman's rank correlation coefficients were calculated using the cor()  
function and  $P$  values were obtained by corr.test() from library('psych') in R. Obtained  $P$  values  
were further FDR corrected with qvalue(). For RNA-seq studies on acute depletion of KLF6

465 upon dTAG<sup>v</sup>-1 treatment, we used two homozygous and two heterozygous KLF6-FKBP12<sup>F36V</sup>-  
V5 tagged clonal cell lines and treated them with either 500nM dTAG<sup>v</sup>-1 or equivalent DMSO  
control for 24 hours. These experiments were done twice i.e., two independent replicates and  
treated as batches for analysis purposes. Afterwards, total RNA was isolated from 14 samples  
total (eight dTAG<sup>v</sup>-1 treated samples and six DMSO treated control samples), and RNA-seq  
470 libraries were prepared and sequenced. Differential gene expression analysis was done using the  
statistical package DESeq2 in R. For DESeq2 analysis, we coded dTAG<sup>v</sup>-1 and DMSO treatment  
as continuous variables where homozygous samples treated with dTAG<sup>v</sup>-1 were coded as 0,  
heterozygous samples treated with dTAG<sup>v</sup>-1 as 0.9, and DMSO treated samples as 1, based on  
the overall effect of gene dosage in principal component analysis.

### 475 **Skin color heritability enrichment analysis**

White British UK Biobank GWAS summary statistics were obtained from the Neale lab website  
(<http://www.nealelab.is/uk-biobank/>). This GWAS was conducted using self-reported,  
categorical skin color traits (Very fair, Fair, Light olive, Dark olive, Brown, Black, see  
<https://biobank.ctsu.ox.ac.uk/crystal/field.cgi?id=1717> for details). While the majority of White  
480 British individuals belong to the Very fair and Fair categories, there is nevertheless substantial  
heritable variation among self-reported skin color categories within that population. GWAS was  
clumped into lead SNPs at various significance thresholds (5e-8, 1e-6, 1e-4) using plink v1.9,  
with the following parameters: --clump-p1 (6) --clump-p2 (6) --clump-r2 0.01 --clump-kb 10000.  
A White British-specific LD reference panel from Sinnott-Armstrong and Naqvi, 2020 (75) was  
485 used. NCBI-EBI GWAS Catalog results were accessed in May 2020; all associations with the  
“skin pigmentation” search term were downloaded, and all genes in the “Mapped gene” column  
were used as the gene set. Since the top 1000 skin color SNPs in African populations were not  
pruned or clumped for independence, we primarily assigned each SNP to the closest gene. For  
490 stratified LD score regression analyses, annotations were constructed using 100kb up- and  
downstream of either CRISPR activators, repressors, or both. Coefficient Z-scores and  
heritability enrichments were calculated relative to the set of baselineLD annotations provided by  
Finucaine et al. (38).

### 495 **Local heritability estimation for genomic regions**

HESS (<https://doi.org/10.1016/j.ajhg.2016.05.013>) was used to estimate local SNP heritability  
for sets of genomic regions containing pigmentation-associated loci or genes. Neale lab White  
British UK Biobank GWAS summary statistics were used, together with LD reference panels  
provided on the HESS website (<https://huwenboshi.github.io/hess/>) and approximately  
500 independent LD blocks in Europeans from Berisza and Pickrell ([10.1093/bioinformatics/btv546](https://doi.org/10.1093/bioinformatics/btv546)).  
HESS was used to estimate the heritability explained by the subset of independent LD blocks  
that overlapped either a) genome-wide significant skin color GWAS loci as described above, or  
b) annotated known pigmentation genes from Baxter et. al, (6) extended on 100kb on either side.

505

## Melanocyte eQTL analysis

510 We obtained eQTL summary statistics for all SNP-gene pairs from a previously published study  
of primary melanocytes in European-ancestry individuals (40). We first subsetted all SNP-gene  
pairs for any of the screen hit genes by  $p$ -value  $< 0.01$ , and from these considered the SNP with  
the minimum  $p$ -value per gene (such that each screen hit was only assigned to one SNP). In cases  
515 where the same SNP was assigned to multiple genes, we only considered the gene with the  
closest TSS to the SNP. We then intersect this list of SNP-gene pairs with the UK Biobank  
White British skin color GWAS summary statistics, and further only analyzed SNP-gene pairs  
for which the SNP showed association with skin color ( $p < 0.01$ ).

## 520 Selection analysis

For selection analysis, we obtained population VCF files for the 1000 Genomes Phase 3 Panel  
(1000G; <ftp://ftp.1000genomes.ebi.ac.uk/vol1/ftp/release/20130502/>) (76). VCF files were  
525 filtered to retain biallelic SNPs, with minor allele frequency  $> 0.01$ . VCF manipulation and  
processing were accomplished with VCFtools (77). For each melanin-promoting gene identified  
in our screen, we considered all SNPs within a  $\pm 100$ Kb upstream and downstream flanking  
regions of the gene body in order to consider SNPs within the regulatory domain of said gene.  
We define these regions as melanin-promoting genic loci. The gene body was defined as the  
530 region between the gene's transcription start site (TSS) and transcription end site (TES) provided  
in GENCODE V34 basic annotation GTF for GRCh37 genome assembly (78).  
PBS values per SNP were estimated using Weir and Cockerham  $F_{ST}$  [defined in (79)] and  
measured between pairwise comparisons of the three continental super-populations. The  
continental super-populations used in our analysis included Africans, Europeans and East-Asian.  
535  $F_{ST}$  were computed using VCFtools. Negative  $F_{ST}$  values were treated as zero.  $F_{ST}$  values were  
further log transformed for PBS computation (41). For a given three population tree topology, we  
computed PBS for population  $A$  using the equation

$$PBS_A = \frac{1}{2}(E_{A,B} + E_{A,C} - E_{B,C})$$

where  $E$  denotes the log-transformed  $F_{ST}$  between the indicated pairwise populations of A,B, and  
C. For the African and European populations, genome-wide PBS statistics per SNP were plotted  
540 as Manhattan plots and the top 0.01% and 0.1% quantile of all PBS statistics were superimposed  
on said plots, in order to characterize SNPs within pro-melanin genic loci with the most extreme  
PBS values that should have evolved under positive selection.

We compute empirical  $p$ -values for each SNP's PBS statistic using the genome-wide distribution  
of PBS statistics for all SNPs. When comparing PBS  $p$ -values with GWAS effect sizes, the set  
545 of SNPs within pro-melanin loci was LD-pruned for approximate independence using plink with  
--indep-pairwise 50 5 0.01 and the 1000G European super-population LD reference panel. The  
effect of allele that is increasing in frequency in Europeans as compared to Africans and East  
Asians (using 1000G super-population allele frequencies) was computed using the above-  
described White British UKBB skin color GWAS.

550 Some of the schematic diagrams were created using biorender.com.

Fig. S1.

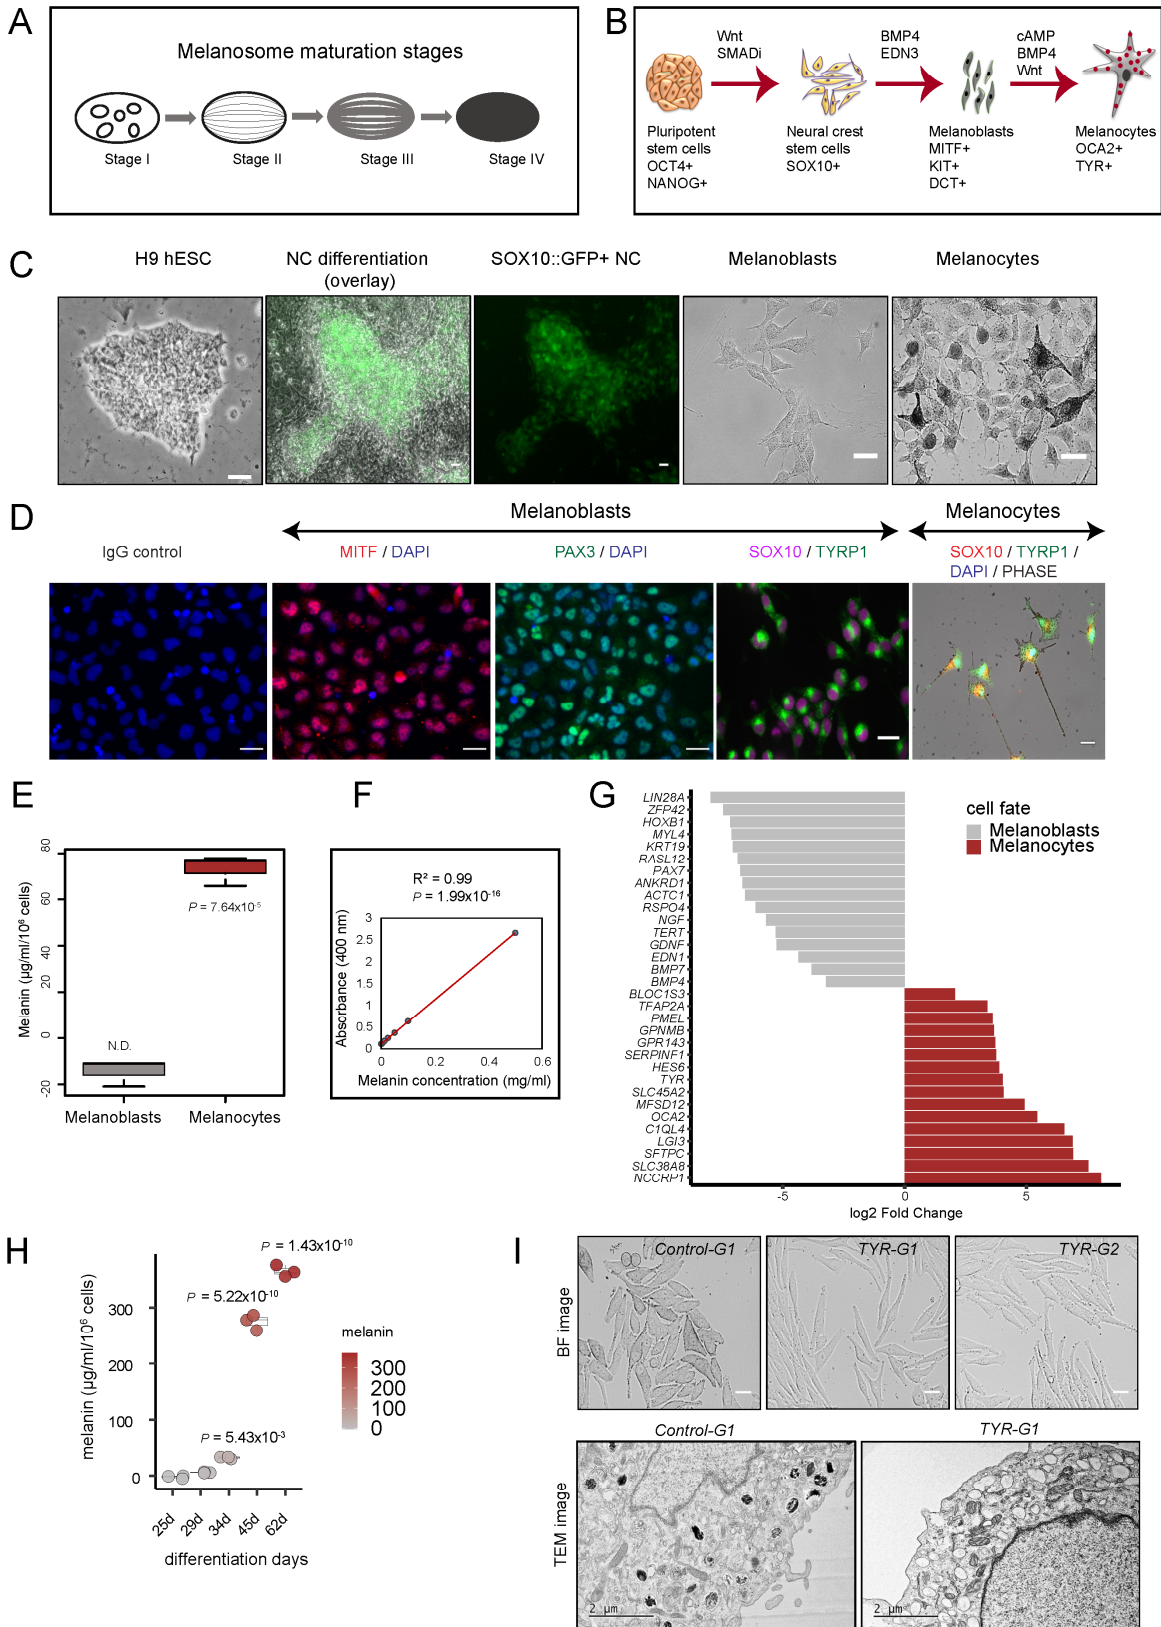

**Fig. S1. Derivation of melanoblasts and melanocytes from pluripotent stem cells (PSC) and melanin measurements.** (A) Schematic of four stages of melanosome maturation. Stage I melanosomes contain intraluminal vesicles, stage II melanosomes deposit parallel PMEL fibrils on which melanogenesis takes place. Stage III and IV melanosomes correspond to partially and fully melanized states, respectively. (B) Schematic of the PSC-to- melanocytes differentiation process. PSC were differentiated into neural crest cells, melanoblasts and melanocytes in a sequential manner. The key growth factors driving differentiation are shown above the arrows, and lineage markers are shown below each cell type. (C) Stepwise differentiation of H9 human embryonic stem cells (hESC) *SOX10::GFP* reporter line into neural crest (NC) as shown by GFP<sup>+</sup> cells, non-pigmented melanoblasts and finally, pigmented melanocytes. (D) Expression of select markers during differentiation is shown: for melanoblast, fate immunostainings for MITF, PAX3, SOX10 and TYRP1; for melanocytes, immunostainings for SOX10 and TYRP1 overlapping with phase contrast image. (E) Melanin content of H9 hESC-derived melanoblasts and melanocytes. (F) Standard curve depicting relationship between melanin concentration and absorbance at 400 nm. R<sup>2</sup> and P value determined by linear regression. (G) In comparison to melanoblasts, melanocytes express mature melanogenic genes. The first five genes with the highest log<sub>2</sub> fold changes are top 5 most differentially regulated genes in each category. (H) Melanin content at different days of differentiation from hESC to melanocytes. Box plots show median and IQR. Significance tested by ANOVA and two-sided pairwise Welch t-Test with BH correction. P values shown are relative to day 29 of differentiation. (I). Brightfield (BF) and TEM images of *TYR* knockout MNT-1 cells. TEM images show predominance of stage I-II melanosomes and lack of mature melanosomes upon *TYR* loss. (n = 4 sgRNAs treatments). Scale bars: C, D, I (BF) = 25μM. TEM Scale bars: 2 μM. N.D. = not detected.



Fig. S2.

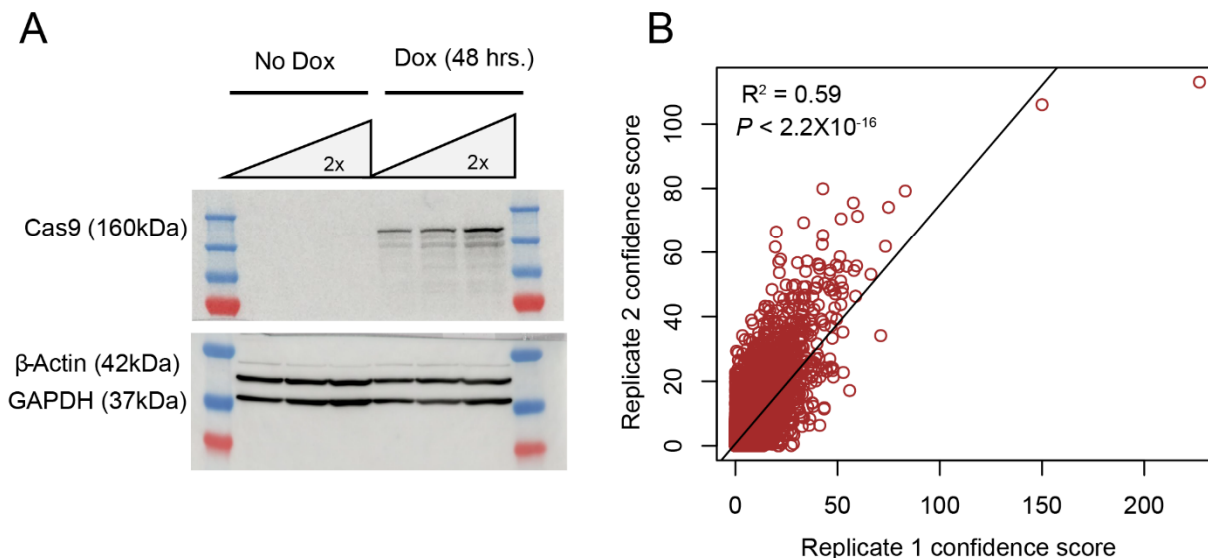

580

**Fig. S2. Inducible Cas9 expressing cell line validation and replication of pigmentation**

**CRISPR-Cas9 screen.** (A) Western blot for Cas9-MNT-1 cells showing Cas9 expression upon 48-hour doxycycline treatment. (B) Reproducibility of two independent genome-wide screens

585 (n=2). CasTLE analysis of genome-wide screens in MNT-1 cells, with CasTLE confidence scores of over 20,000 genes represented as individual points, analyzed by CasTLE likelihood ratio test. R<sup>2</sup> and P value determined by linear regression.

590

595

Fig. S3.

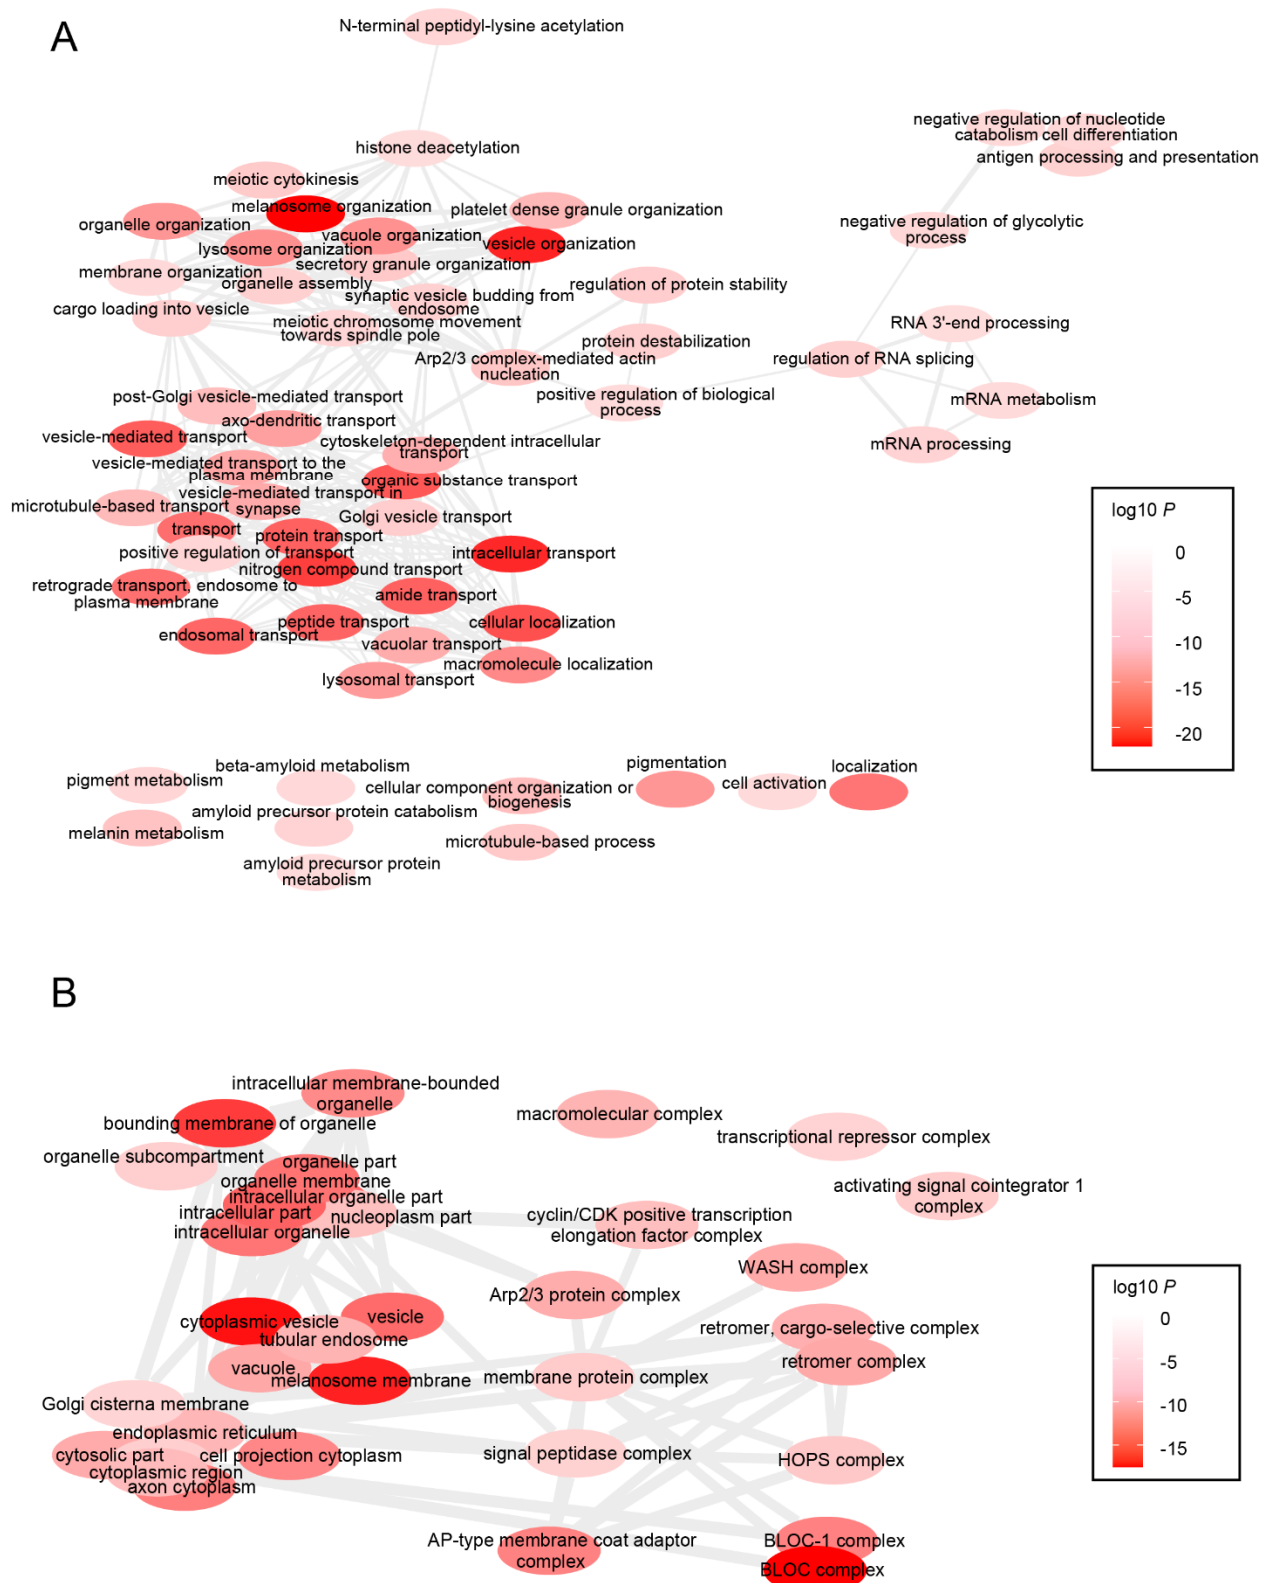

**Fig. S3. Functional classification of pigmentation screen hits.** Gene ontology enrichment analysis for (A) biological processes and (B) biological components performed using GOrilla (73). The screen hits at <10% FDR were used as the input gene set against all genes as background set. Enriched GO terms with q value <0.05 were used as an input in REVIGO (74) to remove redundant GO terms and make graphs. Similar GO terms are joined by the edges in the graph, where the line thickness indicates the degree of similarity. Color shading of bubbles represents hypergeometric test *P* values from GOrilla output.

605

610

Fig. S4.

A

Known pigmentation genes

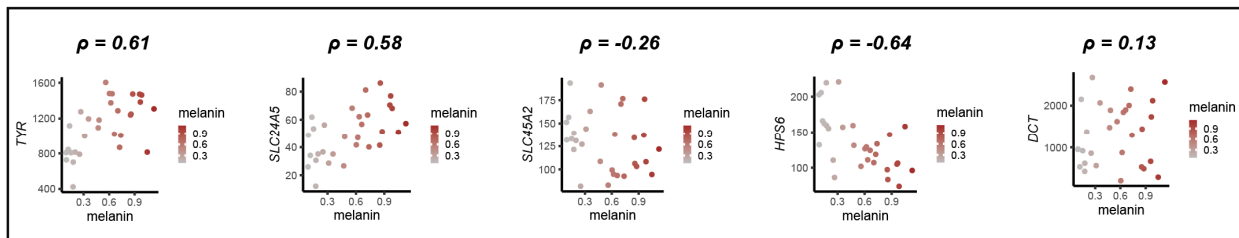

B

Novel pigmentation genes

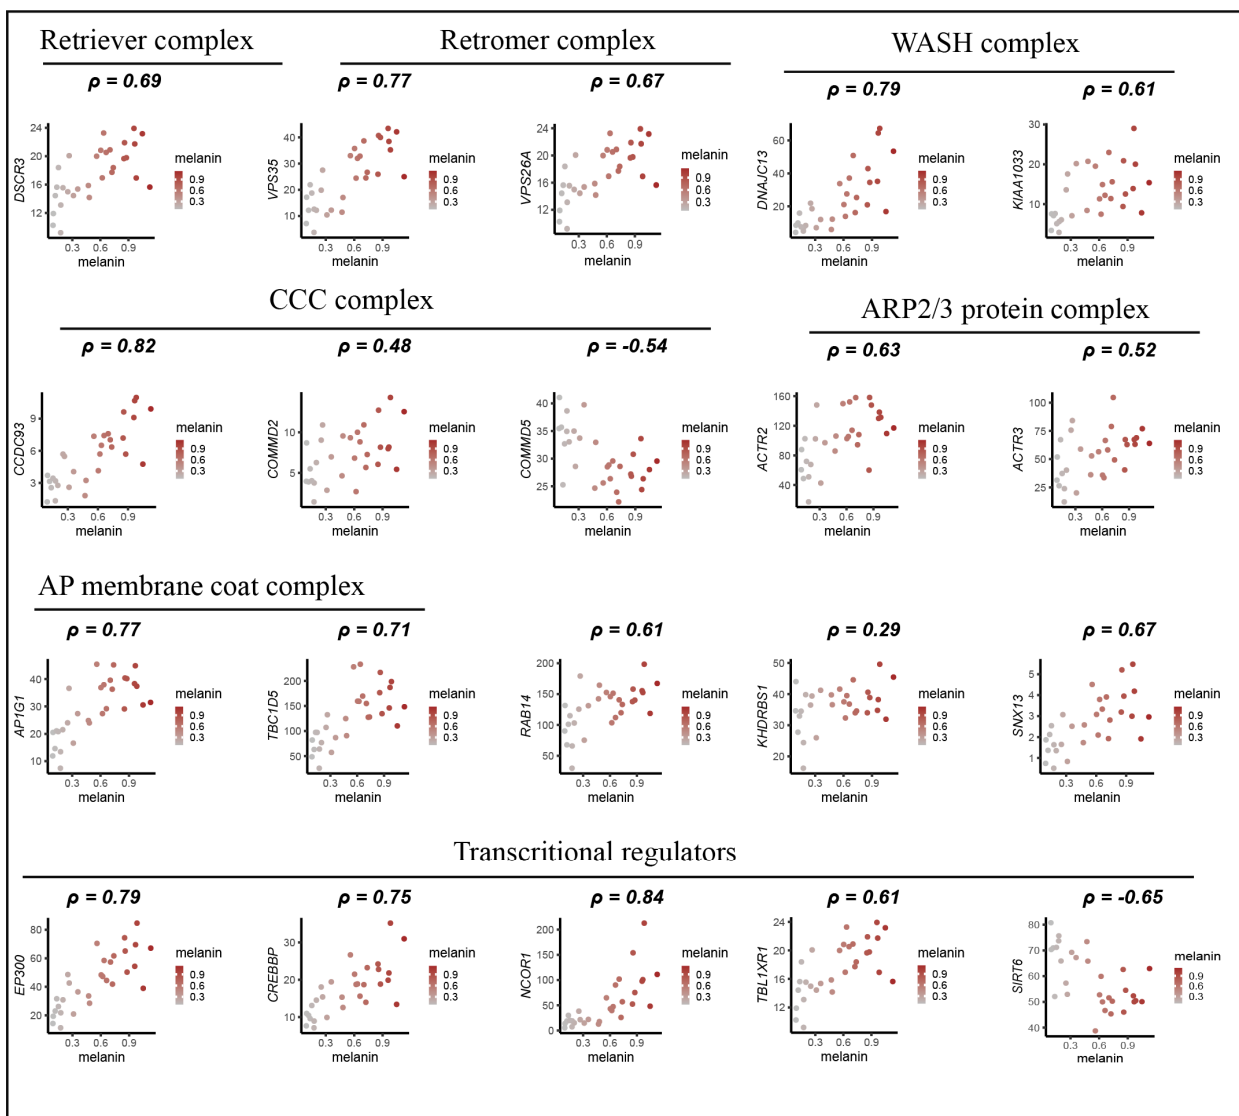

**Fig. S4. Spearman's rank correlation coefficients ( $\rho$ ) depicting relationship between**  
620 **melanin content and gene expression (TPM). (A) Select known pigmentation genes**  
rediscovered in the screen. **(B) Novel melanin-promoting genes classified by their known**  
molecular function. Plotted is melanin content (ordinate) vs RNA-seq expression level (TPM,  
abscissa).

625

Fig. S5.

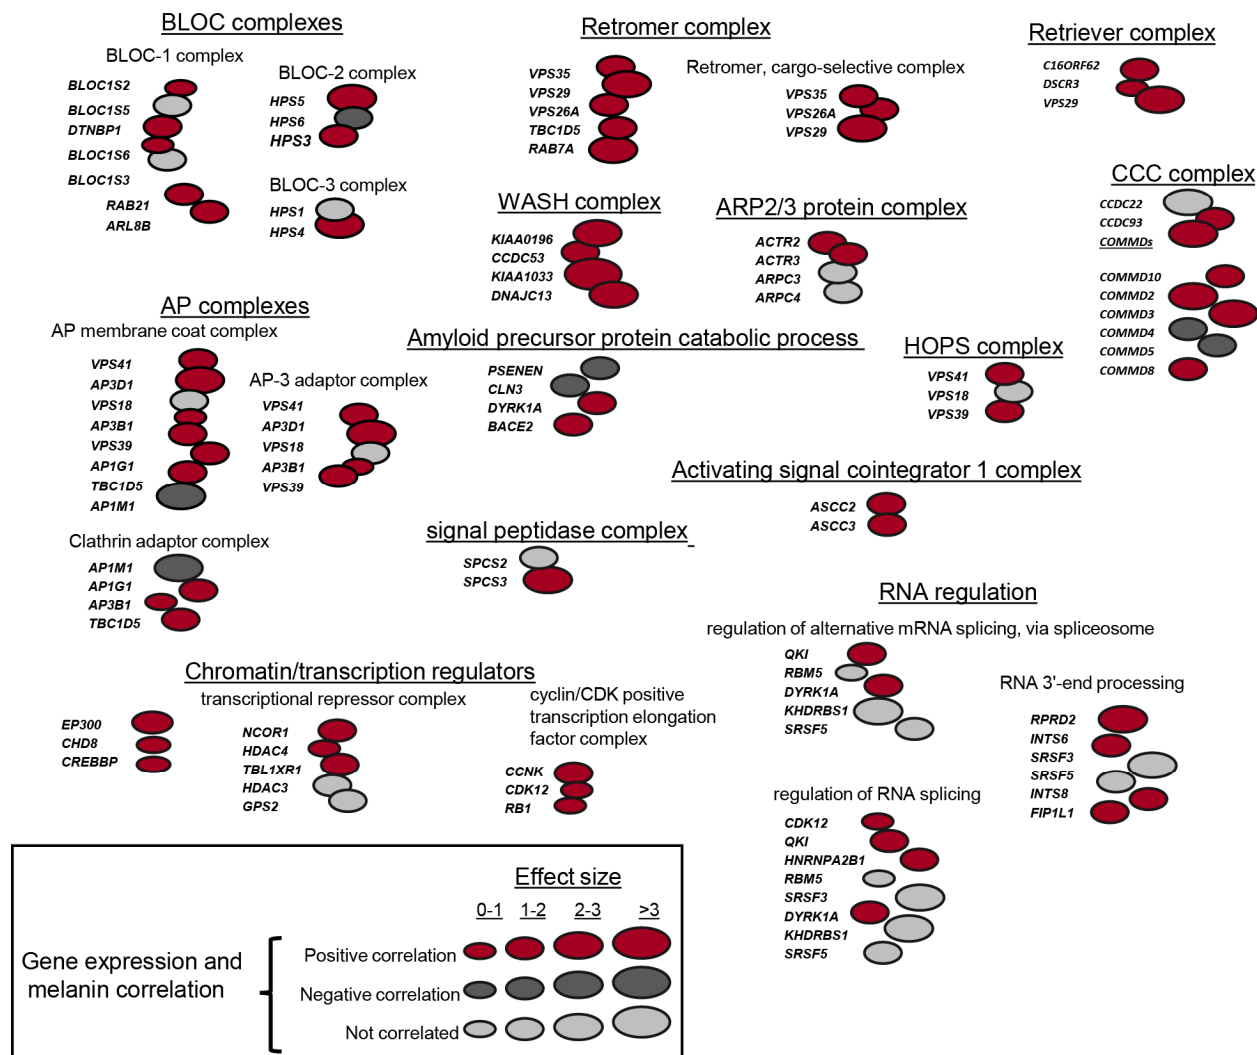

630

635

**Fig. S5. Classification of screen hits in relation to changes in gene expression in diversely pigmented melanocytes.** Schematic of screen hits grouped according to known biological function and presence in common macromolecular complexes (similar to Fig. 2E), further color-coded based on whether there is a positive (dark red), negative (dark grey) or no (light grey) correlation between gene expression (TPM) and melanin content, as detected in the RNA-seq analysis of diversely pigmented individuals. Bubble size indicates CasTLE effect size.

Fig. S6.

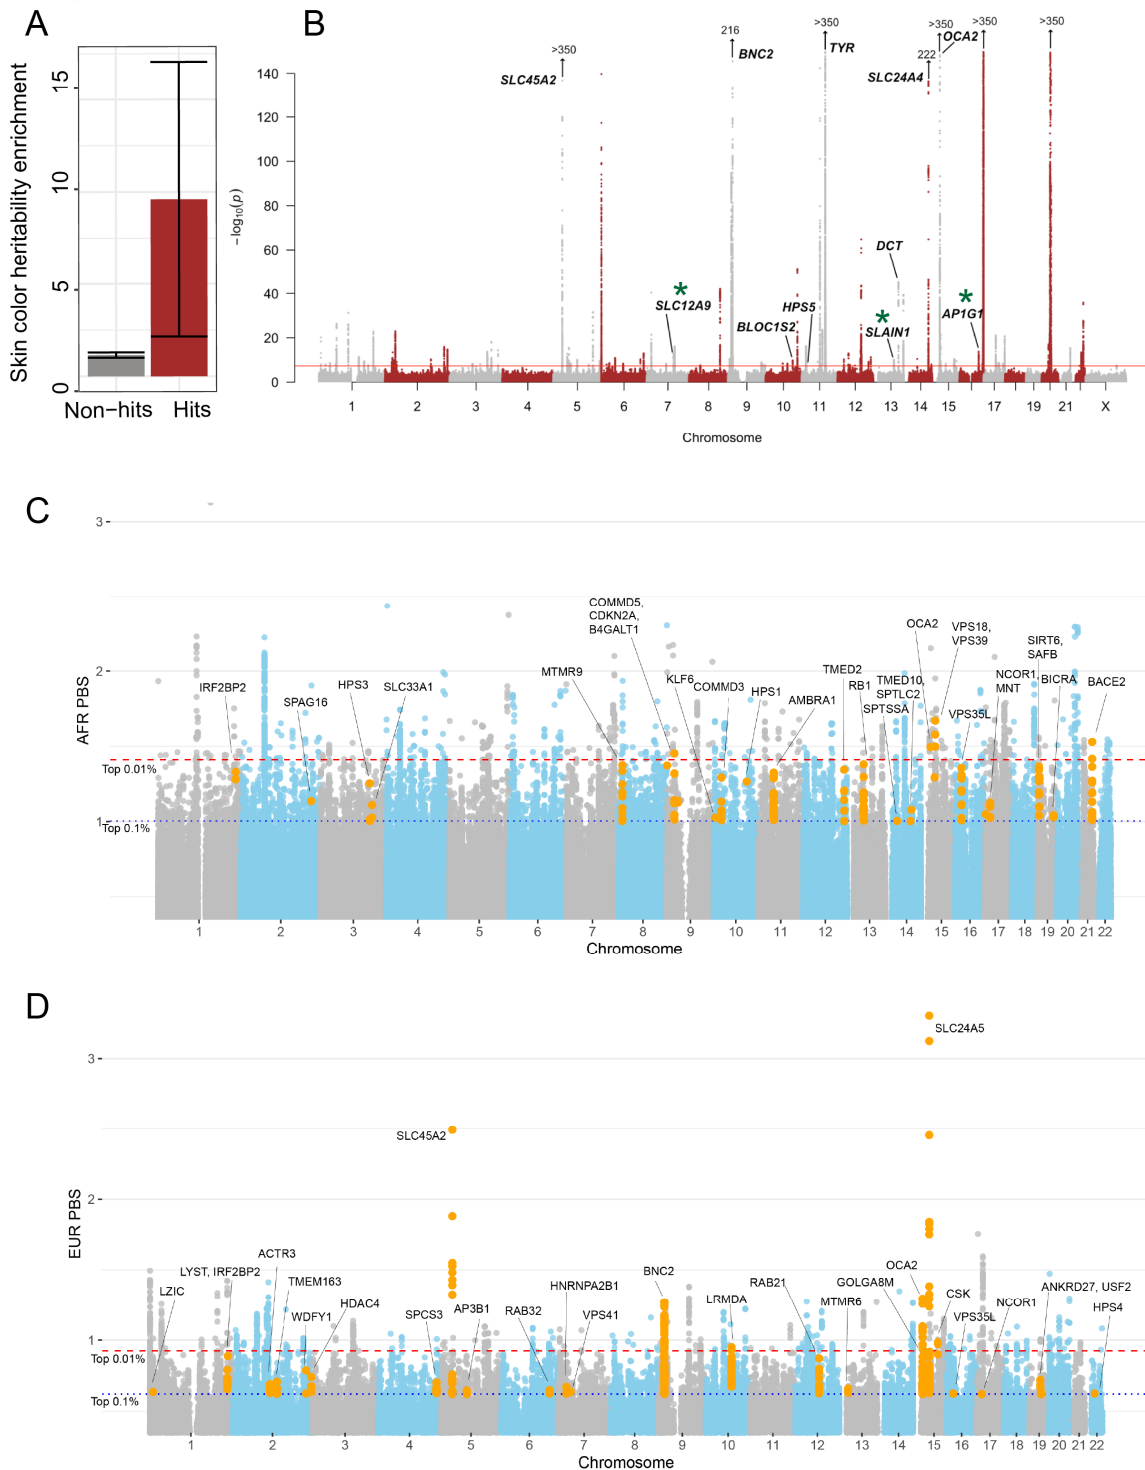

**Fig. S6. Pigmentation screen hits are enriched for skin color heritability and show evidence of recent positive selection.** (A) The effect size of skin color heritability enrichment (from UKBB GWAS) for screen hits and non-hits is shown. The screen hits were significantly enriched for skin color heritability (Fold-enrichment 9.61, standard error 3.80,  $P = 3.11 \times 10^{-2}$ ) in comparison to all non-hits (fold-enrichment 1.15, standard error 0.073,  $P = 3.37 \times 10^{-2}$ ). Non-hits are defined as all genes assayed in the CRISPR screen with  $FDR > 0.1$ . The Error bars indicate 95% confidence interval for heritability fold-enrichment. (B) Manhattan plot of GWAS for skin color in the UK Biobank (UKBB). Genes in bold were detected as pigmentation screen hits and lie within 100kb of a genome-wide significant GWAS signal ( $P < 5 \times 10^{-8}$ ) for skin color. Genes with a green asterisk have no previously described role in pigmentation. Vertical arrows indicate additional SNPs with the indicated  $-\log_{10}(P)$  of association. (C) Manhattan plot showing African PBS scores, computed for the African, European, and East-Asian trio. Colored in orange dots are SNPs that reside within 100Kb upstream or downstream of the 169 melanin-promoting genes identified in the screen. Several SNPs within these genic loci have PBS scores that are larger than the top 0.01% quantile of genome-wide PBS scores (i.e., orange dots above the dashed red line), which include *CDKN2A*, *OCA2*, *VPS39*, and *BACE2*. In the more relaxed setting, several melanin-promoting genic loci' SNPs are larger than the top 0.1% quantile of genome-wide PBS scores (orange dots above the blue dotted line). (D) Manhattan plot showing European PBS scores, computed for the African, European, and East-Asian trio. *SLC45A2*, *SLC24A5*, *OCA2*, *BNC2*, *GOLGA8M* and *LRMDA* loci have SNPs with PBS scores larger than the top 0.01% quantile of genome-wide threshold (i.e., above the red dashed line). At threshold of 0.1% quantile (blue dotted line), many additional melanin-promoting genes are enriched such as *ACTR3*, *TMEM163*, *HDAC4*, *RAB21*, and *NCOR1*.



Fig. S7.

A

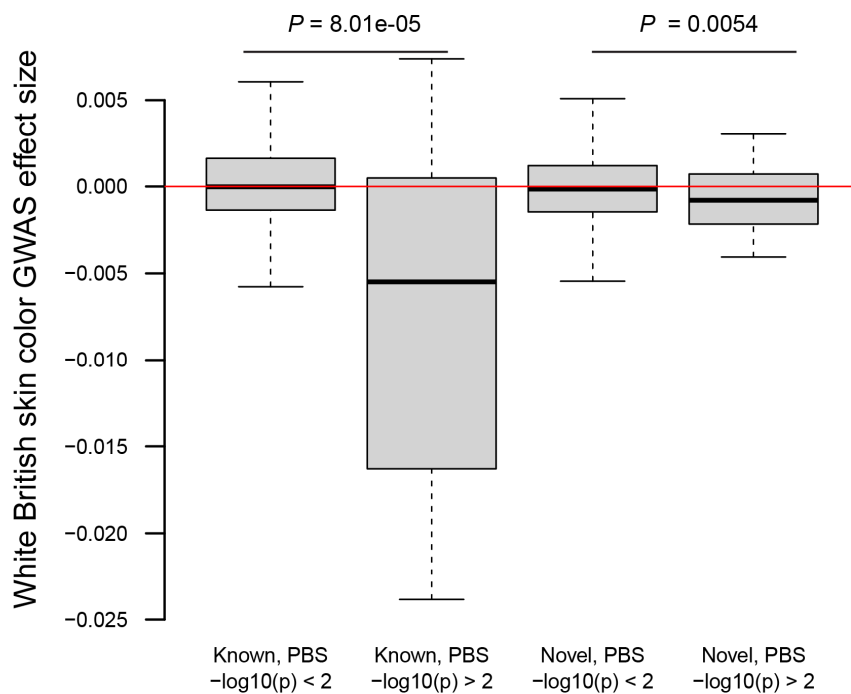

B

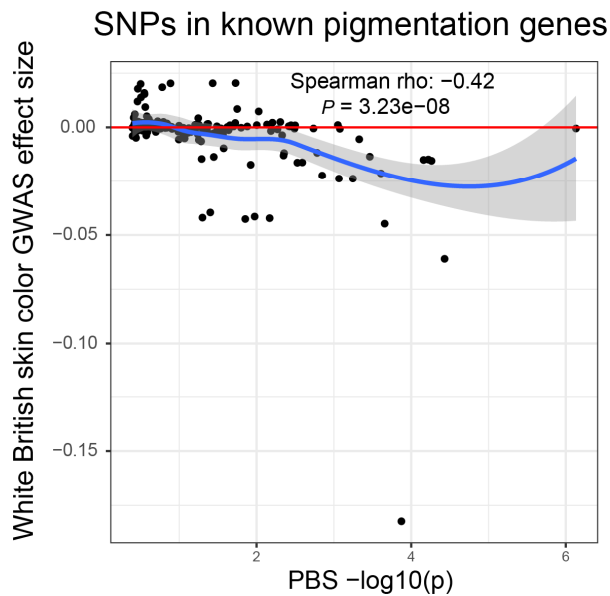

C

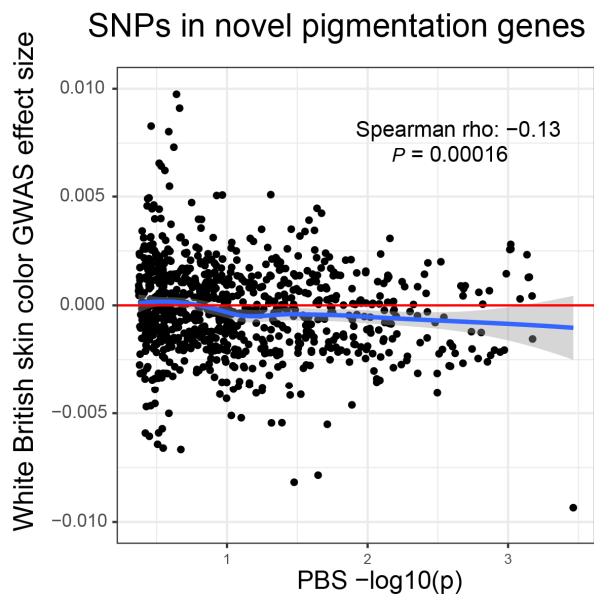

665

670

**Fig. S7. SNPs of melanin-promoting genes identified in CRISPR screen show evidence of recent positive selection and drive variable melanogenesis in diversely pigmented humans.**

675 (A) CRISPR screen hits show correlation between selection signals and skin color GWAS effect sizes. For independent SNPs in the indicated PBS  $-\log_{10}(\text{p-value})$  ranges lying in melanin-promoting gene locus (as defined in Fig. S6C, see Methods) of known (left) or novel (right) screen hits, the effect of the allele that is increased in Europeans on skin color (from UKBB GWAS) is shown. Negative effect sizes mean association with lighter skin color. *P*-values are

680 from Wilcoxon rank-sum test. For independent SNPs lying in the melanin-promoting gene locus of known (B) or novel (C) screen hits, the effect of the allele that is increased in Europeans on skin color (from UKBB GWAS) is shown. Negative effect sizes mean association with lighter skin color. Blue line and shaded area represent fitted LOESS curve and 95% confidence intervals.

685

690

695

700

Fig. S8.

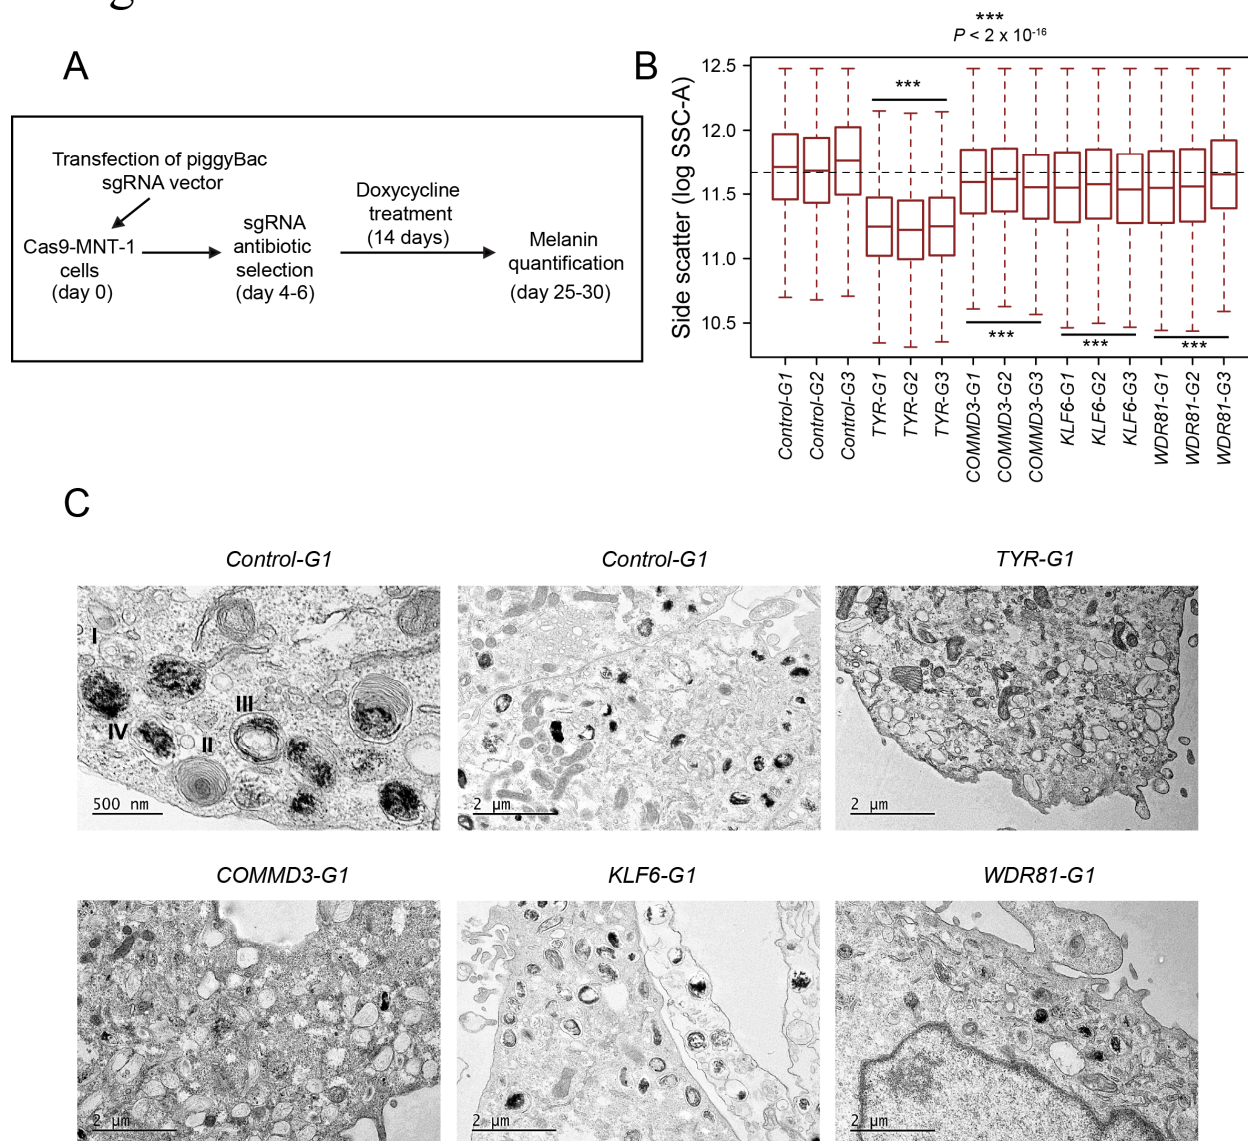

**Fig. S8. Effects of candidate gene knockouts on SSC and melanosome biogenesis.**

(A) Schematic of the CRISPR-Cas9 based validation of novel pigmentation genes. (B)

705 Knockouts of candidate genes affect side scatter (SSC) property of cells. Box plots show median log SSC and IQR, whiskers are  $1.5 \times$  IQR. Two-sided pairwise Wilcoxon Rank Sum Test with Benjamini & Hochberg correction was performed to compare SSC distributions and significance.  $P$  values shown are relative to control-edited cells. (C) TEM images of indicated gene knockout cells showing distribution of melanosomes. TEM Scale bars: 500 nm and 2  $\mu$ M.



**Fig. S9. KLF6 regulate melanogenesis *in-vivo* and generation of endogenously tagged *KLF6* cell lines.** (A) P5 pups with both functional *Klf6* alleles (*Klf6<sup>fl/fl</sup>*), no functional *Klf6* alleles (*TyrCre::Klf6<sup>fl/fl</sup>*), and one functional allele (*TyrCre::Klf6<sup>fl/+</sup>*) show the dose-dependent effect KLF6 has on pigmentation. (B) Hematoxylin and eosin-stained mouse skin shows normal skin morphology. (C) Schematic diagram of endogenously tagged *KLF6* locus. (D) DNA gel electrophoresis images of homozygous (clone #49, #25) and heterozygous tagged clonal cell lines (clone #50, #66) showing correct PCR band sizes. (E) Sanger sequencing chromatogram confirming correct sequence of a homozygous and heterozygous tagged clonal line. (F) Western blot was performed on cell lysates from three tagged clonal MNT-1 cell lines after 24-hour treatment with DMSO or dTAG molecules (dTAG-13 and dTAG<sup>v</sup>-1). dTAG<sup>v</sup>-1 treatment led to rapid degradation of tagged protein as probed by anti-V5 antibody. Scale bars: B, H&E images = 25μM.

725

730

735

Fig. S10.

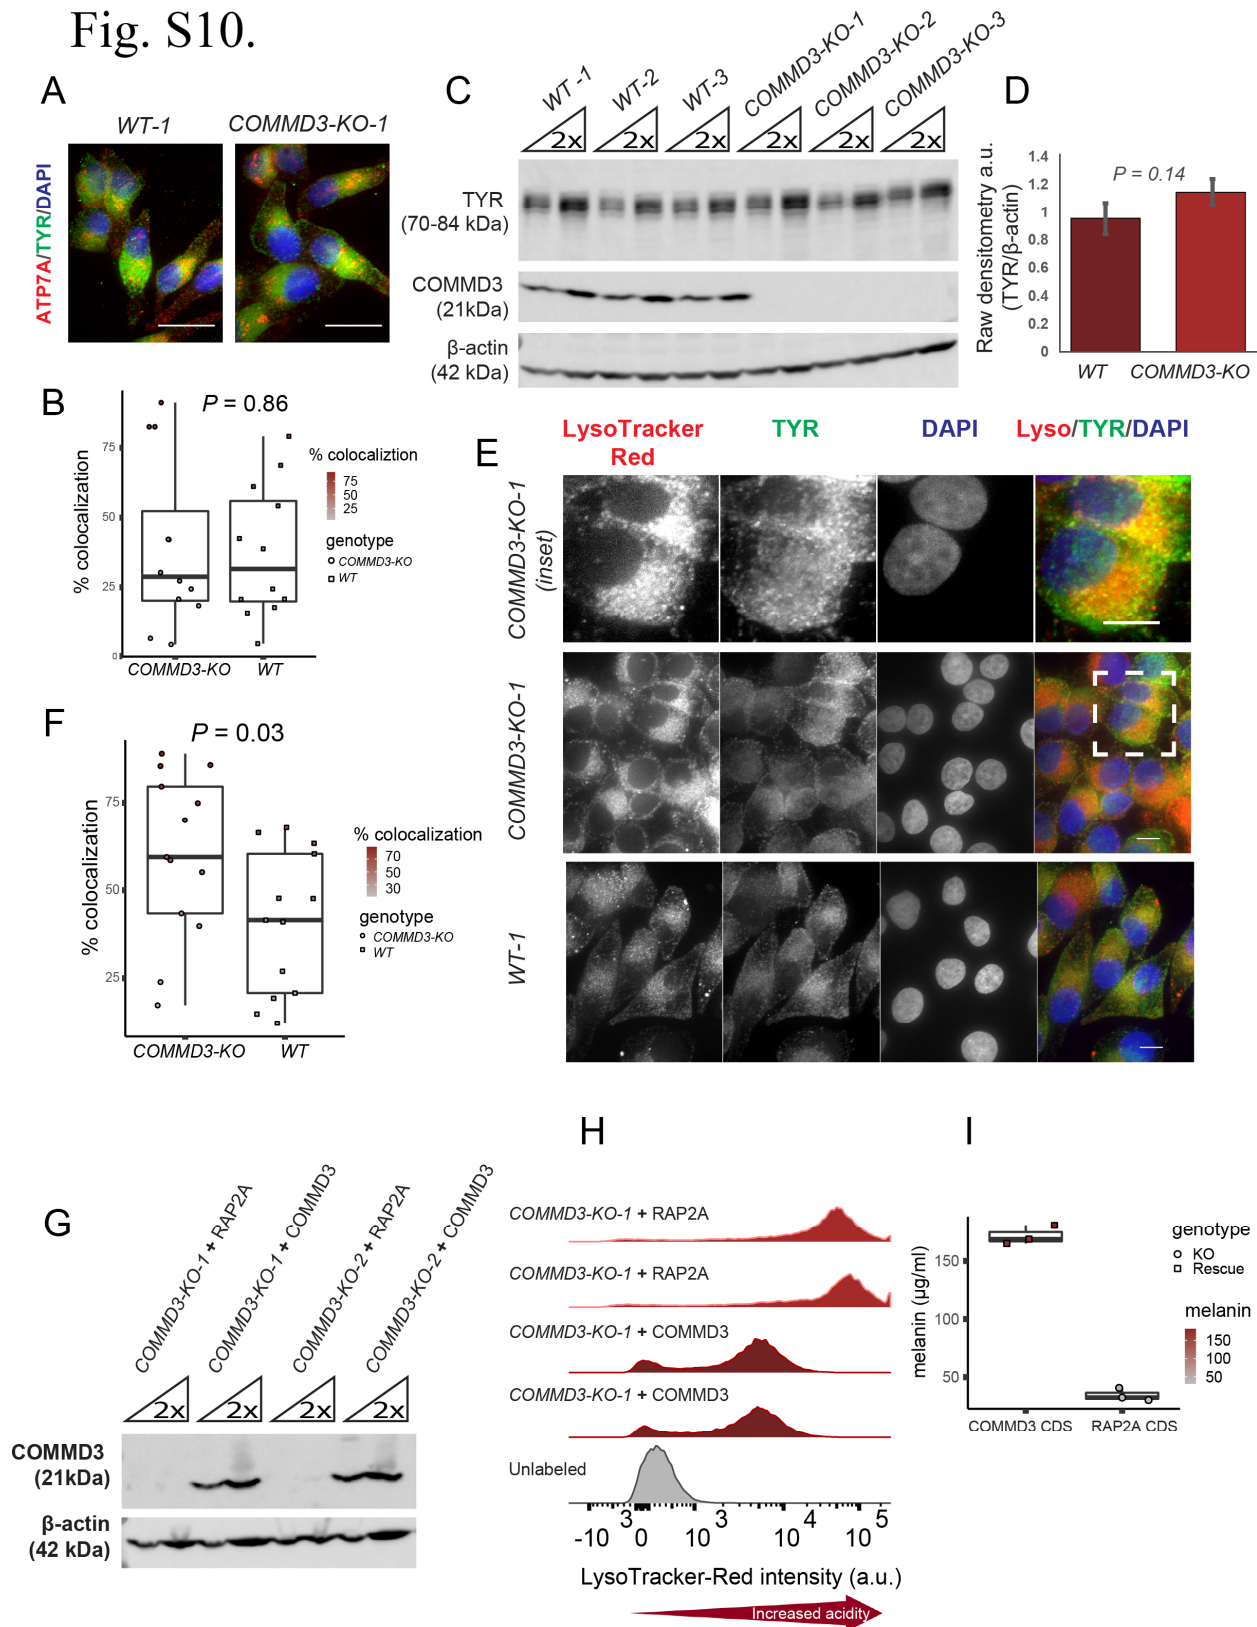

740 **Fig. S10. COMMD3 regulates melanosomal pH and melanogenesis.**

(A) Colocalization of copper transporter ATP7A in melanosomes is not perturbed by loss of COMMD3, as shown by co-immunostaining of ATP7A and melanosomal marker TYR. (B) Colocalization quantification shows no significant difference in ATP7A positive melanosomes in *COMMD3-KO* and *WT* (control-edited) cells. Each circle is Manders' colocalization coefficient M2 from one image, which measures the percentage of TYR fluorescence signal co-occurring with ATP7A fluorescence signal. (C) COMMD3 deletion does not affect total TYR protein levels as shown by western blots done on *COMMD3-KO* and *WT* (control edited) clonal MNT-1 clonal cell lines ( $n=3$ ). (D) ImageJ densitometry quantification of western blots (C) ( $n=3$ ). (E) COMMD3 deletion leads to an increase in acidic melanosomes as shown by increased colocalization of TYR positive melanosomes with LysoTracker Red dye ( $n=3$ ). Images are shown for one *COMMD3-KO-1* and *WT-1* (control-edited) clonal line. (F) Colocalization quantification shows a significantly higher percentage of LysoTracker Red-containing (acidic) and TYR positive melanosomes in *COMMD3-KO* cells compared to *WT* (control-edited) cells. Each circle is Manders' colocalization coefficient M2 from one image, which measures the percentage of TYR fluorescence signal co-occurring with LysoTracker Red fluorescence signal. (G) Immunoblots for two *COMMD3-KO* clonal lines expressing COMMD3 show a band for COMMD3, while no COMMD3 band is seen when an unrelated protein, RAP2A (32), is overexpressed. (H) COMMD3 overexpression in *COMMD3-KO* cells rescues reduced pH compared to RAP2A (a constitutively expressed protein) overexpression as shown by flow cytometry histograms.  $n=2$ . (I) COMMD3 overexpression in *COMMD3-KO* cells rescues the loss of melanin as shown by melanin quantification. Box plots show median log absorbance and IQR. Significance tested by Welch t-test.  $n=3$ . Scale bars: A= 25 $\mu$ M; E= 10  $\mu$ M.

765 **Table S1.** CRISPR screen hits corresponding to low side scatter FACS sort are shown with hits at 10% FDR are highlighted in yellow color and hits between 10-20% FDR are highlighted with blue color.

< Excel file>

770 **Table S2.** GO biological processes and components enrichment analysis for CRISPR screen hits at 10% FDR.

< Excel file>

775 **Table S3.** Donor records for human foreskin tissue collection. Parent-reported ethnicity and melanin measurements are documented.

< Excel file>

**Table S4.** RNA-seq transcript per million (TPM) data for all primary human melanocytes. All columns contain donor identifier as described in table S3.

< Excel file>

780 **Table S5.** Spearman correlation coefficients calculation for RNA-seq TPM and melanin (OD 400 nm) measurements.

< Excel file>

785 **Table S6.** Fisher test contingency table and gene assignment table for human pigmentation heritability enrichment analyses.

< Excel file>

790 **Table S7.** Table of African PBS scores and their empirical p-values. Genomic coordinates are hg19. SNP details (i.e., rsid, reference and alternate allele information) were obtained from the 1000G VCFs.

< Excel file>

795 **Table S8.** Table of European PBS scores and their empirical p-values. Genomic coordinates are hg19. SNP details (i.e., rsid, reference and alternate allele information) were obtained from the 1000G VCFs.

< Excel file>

800 **Table S9.** Animal husbandry genotype and phenotype record.

< Excel file>

**Table S10.** Skin melanocytes count data for *Klf6*<sup>+/+</sup> and *TyrCre::Klf6*<sup>fl/fl</sup> genotyped animals.

< Excel file>

805



## References and Notes

1. W. J. Pavan, R. A. Sturm, The Genetics of Human Skin and Hair Pigmentation. *Annu. Rev. Genomics Hum. Genet.* **20**, 41–72 (2019). [doi:10.1146/annurev-genom-083118-015230](https://doi.org/10.1146/annurev-genom-083118-015230) [Medline](#)
2. E. E. Quillen, H. L. Norton, E. J. Parra, F. Lona-Durazo, K. C. Ang, F. M. Illiescu, L. N. Pearson, M. D. Shriver, T. Lasisi, O. Gokcumen, I. Starr, Y.-L. Lin, A. R. Martin, N. G. Jablonski, Shades of complexity: New perspectives on the evolution and genetic architecture of human skin. *Am. J. Phys. Anthropol.* **168** (suppl. 67), 4–26 (2019). [doi:10.1002/ajpa.23737](https://doi.org/10.1002/ajpa.23737) [Medline](#)
3. J. Rocha, The Evolutionary History of Human Skin Pigmentation. *J. Mol. Evol.* **88**, 77–87 (2020). [doi:10.1007/s00239-019-09902-7](https://doi.org/10.1007/s00239-019-09902-7) [Medline](#)
4. G. Raposo, M. S. Marks, Melanosomes—Dark organelles enlighten endosomal membrane transport. *Nat. Rev. Mol. Cell Biol.* **8**, 786–797 (2007). [doi:10.1038/nrm2258](https://doi.org/10.1038/nrm2258) [Medline](#)
5. L. Le, J. Sirés-Campos, G. Raposo, C. Delevoeye, M. S. Marks, Melanosome Biogenesis in the Pigmentation of Mammalian Skin. *Integr. Comp. Biol.* **61**, 1517–1545 (2021). [doi:10.1093/icb/icab078](https://doi.org/10.1093/icb/icab078) [Medline](#)
6. L. L. Baxter, D. E. Watkins-Chow, W. J. Pavan, S. K. Loftus, A curated gene list for expanding the horizons of pigmentation biology. *Pigment Cell Melanoma Res.* **32**, 348–358 (2019). [doi:10.1111/pcmr.12743](https://doi.org/10.1111/pcmr.12743) [Medline](#)
7. A. R. Martin, M. Lin, J. M. Granka, J. W. Myrick, X. Liu, A. Sockell, E. G. Atkinson, C. J. Werely, M. Möller, M. S. Sandhu, D. M. Kingsley, E. G. Hoal, X. Liu, M. J. Daly, M. W. Feldman, C. R. Gignoux, C. D. Bustamante, B. M. Henn, An Unexpectedly Complex Architecture for Skin Pigmentation in Africans. *Cell* **171**, 1340–1353.e14 (2017). [doi:10.1016/j.cell.2017.11.015](https://doi.org/10.1016/j.cell.2017.11.015) [Medline](#)
8. N. G. Crawford, D. E. Kelly, M. E. B. Hansen, M. H. Beltrame, S. Fan, S. L. Bowman, E. Jewett, A. Ranciaro, S. Thompson, Y. Lo, S. P. Pfeifer, J. D. Jensen, M. C. Campbell, W. Beggs, F. Hormozdiari, S. W. Mpoloka, G. G. Mokone, T. Nyambo, D. W. Meskel, G. Belay, J. Haut, H. Rothschild, L. Zon, Y. Zhou, M. A. Kovacs, M. Xu, T. Zhang, K. Bishop, J. Sinclair, C. Rivas, E. Elliot, J. Choi, S. A. Li, B. Hicks, S. Burgess, C. Abnet, D. E. Watkins-Chow, E. Oceana, Y. S. Song, E. Eskin, K. M. Brown, M. S. Marks, S. K. Loftus, W. J. Pavan, M. Yeager, S. Chanock, S. A. Tishkoff; NISC Comparative Sequencing Program, Loci associated with skin pigmentation identified in African populations. *Science* **358**, eaan8433 (2017). [doi:10.1126/science.aan8433](https://doi.org/10.1126/science.aan8433) [Medline](#)
9. S. Beleza, N. A. Johnson, S. I. Candille, D. M. Absher, M. A. Coram, J. Lopes, J. Campos, I. I. Araújo, T. M. Anderson, B. J. Vilhjálmsson, M. Nordborg, A. Correia E Silva, M. D. Shriver, J. Rocha, G. S. Barsh, H. Tang, Genetic architecture of skin and eye color in an African-European admixed population. *PLOS Genet.* **9**, e1003372 (2013). [doi:10.1371/journal.pgen.1003372](https://doi.org/10.1371/journal.pgen.1003372) [Medline](#)
10. E. Pairo-Castineira *et al.*, Expanded Analysis of Pigmentation Genetics in UK Biobank. bioRxiv 2022.2001.2030.478418 [Preprint] (2022). <https://doi.org/10.1101/2022.01.30.478418>

11. H. Shi, G. Kichaev, B. Pasaniuc, Contrasting the Genetic Architecture of 30 Complex Traits from Summary Association Data, Contrasting the Genetic Architecture of 30 Complex Traits from Summary Association Data. *Am. J. Hum. Genet.* **99**, 139–153 (2016). [doi:10.1016/j.ajhg.2016.05.013](https://doi.org/10.1016/j.ajhg.2016.05.013) [Medline](#)
12. P. Meredith, T. Sarna, The physical and chemical properties of eumelanin. *Pigment Cell Res.* **19**, 572–594 (2006). [doi:10.1111/j.1600-0749.2006.00345.x](https://doi.org/10.1111/j.1600-0749.2006.00345.x) [Medline](#)
13. G. C. Salzman, J. M. Crowell, J. C. Martin, T. T. Trujillo, A. Romero, P. F. Mullaney, P. M. LaBauve, Cell classification by laser light scattering: Identification and separation of unstained leukocytes. *Acta Cytol.* **19**, 374–377 (1975). [Medline](#)
14. Y. Mica, G. Lee, S. M. Chambers, M. J. Tomishima, L. Studer, Modeling neural crest induction, melanocyte specification, and disease-related pigmentation defects in hESCs and patient-specific iPSCs. *Cell Rep.* **3**, 1140–1152 (2013). [doi:10.1016/j.celrep.2013.03.025](https://doi.org/10.1016/j.celrep.2013.03.025) [Medline](#)
15. K. Hoek, D. L. Rimm, K. R. Williams, H. Zhao, S. Ariyan, A. Lin, H. M. Kluger, A. J. Berger, E. Cheng, E. S. Trombetta, T. Wu, M. Niinobe, K. Yoshikawa, G. E. Hannigan, R. Halaban, Expression profiling reveals novel pathways in the transformation of melanocytes to melanomas. *Cancer Res.* **64**, 5270–5282 (2004). [doi:10.1158/0008-5472.CAN-04-0731](https://doi.org/10.1158/0008-5472.CAN-04-0731) [Medline](#)
16. A. Chi, J. C. Valencia, Z.-Z. Hu, H. Watabe, H. Yamaguchi, N. J. Mangini, H. Huang, V. A. Canfield, K. C. Cheng, F. Yang, R. Abe, S. Yamagishi, J. Shabanowitz, V. J. Hearing, C. Wu, E. Appella, D. F. Hunt, Proteomic and bioinformatic characterization of the biogenesis and function of melanosomes. *J. Proteome Res.* **5**, 3135–3144 (2006). [doi:10.1021/pr060363j](https://doi.org/10.1021/pr060363j) [Medline](#)
17. I. Hurbain, W. J. C. Geerts, T. Boudier, S. Marco, A. J. Verkleij, M. S. Marks, G. Raposo, Electron tomography of early melanosomes: Implications for melanogenesis and the generation of fibrillar amyloid sheets. *Proc. Natl. Acad. Sci. U.S.A.* **105**, 19726–19731 (2008). [doi:10.1073/pnas.0803488105](https://doi.org/10.1073/pnas.0803488105) [Medline](#)
18. T. Kushimoto, V. Basrur, J. Valencia, J. Matsunaga, W. D. Vieira, V. J. Ferrans, J. Muller, E. Appella, V. J. Hearing, A model for melanosome biogenesis based on the purification and analysis of early melanosomes. *Proc. Natl. Acad. Sci. U.S.A.* **98**, 10698–10703 (2001). [doi:10.1073/pnas.191184798](https://doi.org/10.1073/pnas.191184798) [Medline](#)
19. A. K. Ganesan, H. Ho, B. Bodemann, S. Petersen, J. Aruri, S. Koshy, Z. Richardson, L. Q. Le, T. Krasieva, M. G. Roth, P. Farmer, M. A. White, Genome-wide siRNA-based functional genomics of pigmentation identifies novel genes and pathways that impact melanogenesis in human cells. *PLOS Genet.* **4**, e1000298 (2008). [doi:10.1371/journal.pgen.1000298](https://doi.org/10.1371/journal.pgen.1000298) [Medline](#)
20. D. W. Morgens, M. Wainberg, E. A. Boyle, O. Ursu, C. L. Araya, C. K. Tsui, M. S. Haney, G. T. Hess, K. Han, E. E. Jeng, A. Li, M. P. Snyder, W. J. Greenleaf, A. Kundaje, M. C. Bassik, Genome-scale measurement of off-target activity using Cas9 toxicity in high-throughput screens. *Nat. Commun.* **8**, 15178 (2017). [doi:10.1038/ncomms15178](https://doi.org/10.1038/ncomms15178) [Medline](#)

21. D. W. Morgens, R. M. Deans, A. Li, M. C. Bassik, Systematic comparison of CRISPR/Cas9 and RNAi screens for essential genes. *Nat. Biotechnol.* **34**, 634–636 (2016).  
[doi:10.1038/nbt.3567](https://doi.org/10.1038/nbt.3567) [Medline](#)
22. H. M. Shapiro, *Practical Flow Cytometry* (Wiley-Liss, 2003).
23. T. Hart, M. Chandrashekhar, M. Aregger, Z. Steinhart, K. R. Brown, G. MacLeod, M. Mis, M. Zimmermann, A. Fradet-Turcotte, S. Sun, P. Mero, P. Dirks, S. Sidhu, F. P. Roth, O. S. Rissland, D. Durocher, S. Angers, J. Moffat, High-Resolution CRISPR Screens Reveal Fitness Genes and Genotype-Specific Cancer Liabilities. *Cell* **163**, 1515–1526 (2015).  
[doi:10.1016/j.cell.2015.11.015](https://doi.org/10.1016/j.cell.2015.11.015) [Medline](#)
24. R. J. Ihry, M. R. Salick, D. J. Ho, M. Sondey, S. Kommineni, S. Paula, J. Raymond, B. Henry, E. Frias, Q. Wang, K. A. Worringer, C. Ye, C. Russ, J. S. Reece-Hoyes, R. C. Altshuler, R. Randhawa, Z. Yang, G. McAllister, G. R. Hoffman, R. Dolmetsch, A. Kaykas, Genome-Scale CRISPR Screens Identify Human Pluripotency-Specific Genes. *Cell Rep.* **27**, 616–630.e6 (2019). [doi:10.1016/j.celrep.2019.03.043](https://doi.org/10.1016/j.celrep.2019.03.043) [Medline](#)
25. K. Tzelepis, H. Koike-Yusa, E. De Braekeleer, Y. Li, E. Metzakopian, O. M. Dovey, A. Mupo, V. Grinkevich, M. Li, M. Mazan, M. Gozdecka, S. Ohnishi, J. Cooper, M. Patel, T. McKerrell, B. Chen, A. F. Domingues, P. Gallipoli, S. Teichmann, H. Ponstingl, U. McDermott, J. Saez-Rodriguez, B. J. P. Huntly, F. Iorio, C. Pina, G. S. Vassiliou, K. Yusa, A CRISPR Dropout Screen Identifies Genetic Vulnerabilities and Therapeutic Targets in Acute Myeloid Leukemia. *Cell Rep.* **17**, 1193–1205 (2016).  
[doi:10.1016/j.celrep.2016.09.079](https://doi.org/10.1016/j.celrep.2016.09.079) [Medline](#)
26. G. G. McGill, M. Horstmann, H. R. Widlund, J. Du, G. Motyckova, E. K. Nishimura, Y.-L. Lin, S. Ramaswamy, W. Avery, H.-F. Ding, S. A. Jordan, I. J. Jackson, S. J. Korsmeyer, T. R. Golub, D. E. Fisher, Bcl2 regulation by the melanocyte master regulator Mitf modulates lineage survival and melanoma cell viability. *Cell* **109**, 707–718 (2002).  
[doi:10.1016/S0092-8674\(02\)00762-6](https://doi.org/10.1016/S0092-8674(02)00762-6) [Medline](#)
27. M. L. Harris, K. Buac, O. Shakhova, R. M. Hakami, M. Wegner, L. Sommer, W. J. Pavan, A dual role for SOX10 in the maintenance of the postnatal melanocyte lineage and the differentiation of melanocyte stem cell progenitors. *PLOS Genet.* **9**, e1003644 (2013).  
[doi:10.1371/journal.pgen.1003644](https://doi.org/10.1371/journal.pgen.1003644) [Medline](#)
28. L. Hou, H. Arnheiter, W. J. Pavan, Interspecies difference in the regulation of melanocyte development by SOX10 and MITF. *Proc. Natl. Acad. Sci. U.S.A.* **103**, 9081–9085 (2006).  
[doi:10.1073/pnas.0603114103](https://doi.org/10.1073/pnas.0603114103) [Medline](#)
29. G. Yang, Y. Li, E. K. Nishimura, H. Xin, A. Zhou, Y. Guo, L. Dong, M. F. Denning, B. J. Nickoloff, R. Cui, Inhibition of PAX3 by TGF-beta modulates melanocyte viability. *Mol. Cell* **32**, 554–563 (2008). [doi:10.1016/j.molcel.2008.11.002](https://doi.org/10.1016/j.molcel.2008.11.002) [Medline](#)
30. P. Sulem, D. F. Gudbjartsson, S. N. Stacey, A. Helgason, T. Rafnar, M. Jakobsdottir, S. Steinberg, S. A. Gudjonsson, A. Palsson, G. Thorleifsson, S. Pálsson, B. Sigurgeirsson, K. Thorisdottir, R. Ragnarsson, K. R. Benediktsdottir, K. K. Aben, S. H. Vermeulen, A. M. Goldstein, M. A. Tucker, L. A. Kiemeny, J. H. Olafsson, J. Gulcher, A. Kong, U. Thorsteinsdottir, K. Stefansson, Two newly identified genetic determinants of pigmentation in Europeans. *Nat. Genet.* **40**, 835–837 (2008). [doi:10.1038/ng.160](https://doi.org/10.1038/ng.160) [Medline](#)

31. A. L. Ambrosio, J. A. Boyle, A. E. Aradi, K. A. Christian, S. M. Di Pietro, TPC2 controls pigmentation by regulating melanosome pH and size. *Proc. Natl. Acad. Sci. U.S.A.* **113**, 5622–5627 (2016). [doi:10.1073/pnas.1600108113](https://doi.org/10.1073/pnas.1600108113) [Medline](#)
32. C. H. Adelman, A. K. Traunbauer, B. Chen, K. J. Condon, S. H. Chan, T. Kunchok, C. A. Lewis, D. M. Sabatini, MFSD12 mediates the import of cysteine into melanosomes and lysosomes. *Nature* **588**, 699–704 (2020). [doi:10.1038/s41586-020-2937-x](https://doi.org/10.1038/s41586-020-2937-x) [Medline](#)
33. C. A. Phillips-Krawczak, A. Singla, P. Starokadomskyy, Z. Deng, D. G. Osborne, H. Li, C. J. Dick, T. S. Gomez, M. Koenecke, J.-S. Zhang, H. Dai, L. F. Sifuentes-Dominguez, L. N. Geng, S. H. Kaufmann, M. Y. Hein, M. Wallis, J. McGaughan, J. Gecz, Bv. Sluis, D. D. Billadeau, E. Burstein, COMMD1 is linked to the WASH complex and regulates endosomal trafficking of the copper transporter ATP7A. *Mol. Biol. Cell* **26**, 91–103 (2015). [doi:10.1091/mbc.e14-06-1073](https://doi.org/10.1091/mbc.e14-06-1073) [Medline](#)
34. P. J. Cullen, F. Steinberg, To degrade or not to degrade: Mechanisms and significance of endocytic recycling. *Nat. Rev. Mol. Cell Biol.* **19**, 679–696 (2018). [doi:10.1038/s41580-018-0053-7](https://doi.org/10.1038/s41580-018-0053-7) [Medline](#)
35. L. Ripoll, X. Heiligenstein, G. Raposo, C. Delevoye, Illuminating the dark side of recycling endosomes. *Cell Cycle* **15**, 1309–1310 (2016). [doi:10.1080/15384101.2016.1160682](https://doi.org/10.1080/15384101.2016.1160682) [Medline](#)
36. H. K. Long, S. L. Prescott, J. Wysocka, Ever-Changing Landscapes: Transcriptional Enhancers in Development and Evolution. *Cell* **167**, 1170–1187 (2016). [doi:10.1016/j.cell.2016.09.018](https://doi.org/10.1016/j.cell.2016.09.018) [Medline](#)
37. P. J. Wittkopp, G. Kalay, Cis-regulatory elements: Molecular mechanisms and evolutionary processes underlying divergence. *Nat. Rev. Genet.* **13**, 59–69 (2011). [doi:10.1038/nrg3095](https://doi.org/10.1038/nrg3095) [Medline](#)
38. H. K. Finucane, B. Bulik-Sullivan, A. Gusev, G. Trynka, Y. Reshef, P.-R. Loh, V. Anttila, H. Xu, C. Zang, K. Farh, S. Ripke, F. R. Day, S. Purcell, E. Stahl, S. Lindstrom, J. R. B. Perry, Y. Okada, S. Raychaudhuri, M. J. Daly, N. Patterson, B. M. Neale, A. L. Price; ReproGen Consortium; Schizophrenia Working Group of the Psychiatric Genomics Consortium; RACI Consortium, Partitioning heritability by functional annotation using genome-wide association summary statistics. *Nat. Genet.* **47**, 1228–1235 (2015). [doi:10.1038/ng.3404](https://doi.org/10.1038/ng.3404) [Medline](#)
39. J. MacArthur, E. Bowler, M. Cerezo, L. Gil, P. Hall, E. Hastings, H. Junkins, A. McMahon, A. Milano, J. Morales, Z. M. Pendlington, D. Welter, T. Burdett, L. Hindorf, P. Flicek, F. Cunningham, H. Parkinson, The new NHGRI-EBI Catalog of published genome-wide association studies (GWAS Catalog). *Nucleic Acids Res.* **45**, D896–D901 (2017). [doi:10.1093/nar/gkw1133](https://doi.org/10.1093/nar/gkw1133) [Medline](#)
40. T. Zhang, J. Choi, M. A. Kovacs, J. Shi, M. Xu, A. M. Goldstein, A. J. Trower, D. T. Bishop, M. M. Iles, D. L. Duffy, S. MacGregor, L. T. Amundadottir, M. H. Law, S. K. Loftus, W. J. Pavan, K. M. Brown; NISC Comparative Sequencing Program; Melanoma Meta-Analysis Consortium, Cell-type-specific eQTL of primary melanocytes facilitates identification of melanoma susceptibility genes. *Genome Res.* **28**, 1621–1635 (2018). [doi:10.1101/gr.233304.117](https://doi.org/10.1101/gr.233304.117) [Medline](#)

41. X. Yi, Y. Liang, E. Huerta-Sanchez, X. Jin, Z. X. P. Cuo, J. E. Pool, X. Xu, H. Jiang, N. Vinckenbosch, T. S. Korneliussen, H. Zheng, T. Liu, W. He, K. Li, R. Luo, X. Nie, H. Wu, M. Zhao, H. Cao, J. Zou, Y. Shan, S. Li, Q. Yang, P. Asan, P. Ni, G. Tian, J. Xu, X. Liu, T. Jiang, R. Wu, G. Zhou, M. Tang, J. Qin, T. Wang, S. Feng, G. Li, J. Huasang, J. Luosang, W. Wang, F. Chen, Y. Wang, X. Zheng, Z. Li, Z. Bianba, G. Yang, X. Wang, S. Tang, G. Gao, Y. Chen, Z. Luo, L. Gusang, Z. Cao, Q. Zhang, W. Ouyang, X. Ren, H. Liang, H. Zheng, Y. Huang, J. Li, L. Bolund, K. Kristiansen, Y. Li, Y. Zhang, X. Zhang, R. Li, S. Li, H. Yang, R. Nielsen, J. Wang, J. Wang, Sequencing of 50 human exomes reveals adaptation to high altitude. *Science* **329**, 75–78 (2010). [doi:10.1126/science.1190371](https://doi.org/10.1126/science.1190371) [Medline](#)
42. B. Vernot, A. B. Stergachis, M. T. Maurano, J. Vierstra, S. Neph, R. E. Thurman, J. A. Stamatoyannopoulos, J. M. Akey, Personal and population genomics of human regulatory variation. *Genome Res.* **22**, 1689–1697 (2012). [doi:10.1101/gr.134890.111](https://doi.org/10.1101/gr.134890.111) [Medline](#)
43. D. G. Torgerson, A. R. Boyko, R. D. Hernandez, A. Indap, X. Hu, T. J. White, J. J. Sninsky, M. Cargill, M. D. Adams, C. D. Bustamante, A. G. Clark, Evolutionary processes acting on candidate cis-regulatory regions in humans inferred from patterns of polymorphism and divergence. *PLOS Genet.* **5**, e1000592 (2009). [doi:10.1371/journal.pgen.1000592](https://doi.org/10.1371/journal.pgen.1000592) [Medline](#)
44. F. Peng, G. Zhu, P. G. Hysi, R. J. Eller, Y. Chen, Y. Li, M. A. Hamer, C. Zeng, R. L. Hopkins, C. L. Jacobus, P. L. Wallace, A. G. Uitterlinden, M. A. Ikram, T. Nijsten, D. L. Duffy, S. E. Medland, T. D. Spector, S. Walsh, N. G. Martin, F. Liu, M. Kayser; International Visible Trait Genetics Consortium, Genome-Wide Association Studies Identify Multiple Genetic Loci Influencing Eyebrow Color Variation in Europeans. *J. Invest. Dermatol.* **139**, 1601–1605 (2019). [doi:10.1016/j.jid.2018.12.029](https://doi.org/10.1016/j.jid.2018.12.029) [Medline](#)
45. R. L. Lamason, M.-A. P. K. Mohideen, J. R. Mest, A. C. Wong, H. L. Norton, M. C. Aros, M. J. Juryneec, X. Mao, V. R. Humphreville, J. E. Humbert, S. Sinha, J. L. Moore, P. Jagadeeswaran, W. Zhao, G. Ning, I. Makalowska, P. M. McKeigue, D. O'donnell, R. Kittles, E. J. Parra, N. J. Mangini, D. J. Grunwald, M. D. Shriver, V. A. Canfield, K. C. Cheng, SLC24A5, a putative cation exchanger, affects pigmentation in zebrafish and humans. *Science* **310**, 1782–1786 (2005). [doi:10.1126/science.1116238](https://doi.org/10.1126/science.1116238) [Medline](#)
46. R. A. Sturm, D. L. Duffy, Human pigmentation genes under environmental selection. *Genome Biol.* **13**, 248 (2012). [doi:10.1186/gb-2012-13-9-248](https://doi.org/10.1186/gb-2012-13-9-248) [Medline](#)
47. P. C. Sabeti, P. Varilly, B. Fry, J. Lohmueller, E. Hostetter, C. Cotsapas, X. Xie, E. H. Byrne, S. A. McCarroll, R. Gaudet, S. F. Schaffner, E. S. Lander, K. A. Frazer, D. G. Ballinger, D. R. Cox, D. A. Hinds, L. L. Stuve, R. A. Gibbs, J. W. Belmont, A. Boudreau, P. Hardenbol, S. M. Leal, S. Pasternak, D. A. Wheeler, T. D. Willis, F. Yu, H. Yang, C. Zeng, Y. Gao, H. Hu, W. Hu, C. Li, W. Lin, S. Liu, H. Pan, X. Tang, J. Wang, W. Wang, J. Yu, B. Zhang, Q. Zhang, H. Zhao, H. Zhao, J. Zhou, S. B. Gabriel, R. Barry, B. Blumenstiel, A. Camargo, M. Defelice, M. Faggart, M. Goyette, S. Gupta, J. Moore, H. Nguyen, R. C. Onofrio, M. Parkin, J. Roy, E. Stahl, E. Winchester, L. Ziaugra, D. Altshuler, Y. Shen, Z. Yao, W. Huang, X. Chu, Y. He, L. Jin, Y. Liu, Y. Shen, W. Sun, H. Wang, Y. Wang, Y. Wang, X. Xiong, L. Xu, M. M. Waye, S. K. Tsui, H. Xue, J. T. Wong, L. M. Galver, J. B. Fan, K. Gunderson, S. S. Murray, A. R. Oliphant, M. S. Chee, A. Montpetit, F. Chagnon, V. Ferretti, M. Leboeuf, J. F. Olivier, M. S. Phillips, S.

- Roumy, C. Sallée, A. Verner, T. J. Hudson, P. Y. Kwok, D. Cai, D. C. Koboldt, R. D. Miller, L. Pawlikowska, P. Taillon-Miller, M. Xiao, L. C. Tsui, W. Mak, Y. Q. Song, P. K. Tam, Y. Nakamura, T. Kawaguchi, T. Kitamoto, T. Morizono, A. Nagashima, Y. Ohnishi, A. Sekine, T. Tanaka, T. Tsunoda, P. Deloukas, C. P. Bird, M. Delgado, E. T. Dermitzakis, R. Gwilliam, S. Hunt, J. Morrison, D. Powell, B. E. Stranger, P. Whittaker, D. R. Bentley, M. J. Daly, P. I. de Bakker, J. Barrett, Y. R. Chretien, J. Maller, S. McCarroll, N. Patterson, I. Pe'er, A. Price, S. Purcell, D. J. Richter, P. Sabeti, R. Saxena, S. F. Schaffner, P. C. Sham, P. Varilly, D. Altshuler, L. D. Stein, L. Krishnan, A. V. Smith, M. K. Tello-Ruiz, G. A. Thorisson, A. Chakravarti, P. E. Chen, D. J. Cutler, C. S. Kashuk, S. Lin, G. R. Abecasis, W. Guan, Y. Li, H. M. Munro, Z. S. Qin, D. J. Thomas, G. McVean, A. Auton, L. Bottolo, N. Cardin, S. Eyheramendy, C. Freeman, J. Marchini, S. Myers, C. Spencer, M. Stephens, P. Donnelly, L. R. Cardon, G. Clarke, D. M. Evans, A. P. Morris, B. S. Weir, T. Tsunoda, T. A. Johnson, J. C. Mullikin, S. T. Sherry, M. Feolo, A. Skol, H. Zhang, C. Zeng, H. Zhao, I. Matsuda, Y. Fukushima, D. R. Macer, E. Suda, C. N. Rotimi, C. A. Adebamowo, I. Ajayi, T. Aniagwu, P. A. Marshall, C. Nkwodimmah, C. D. Royal, M. F. Leppert, M. Dixon, A. Peiffer, R. Qiu, A. Kent, K. Kato, N. Niikawa, I. F. Adewole, B. M. Knoppers, M. W. Foster, E. W. Clayton, J. Watkin, R. A. Gibbs, J. W. Belmont, D. Muzny, L. Nazareth, E. Sodergren, G. M. Weinstock, D. A. Wheeler, I. Yakub, S. B. Gabriel, R. C. Onofrio, D. J. Richter, L. Ziaugra, B. W. Birren, M. J. Daly, D. Altshuler, R. K. Wilson, L. L. Fulton, J. Rogers, J. Burton, N. P. Carter, C. M. Clee, M. Griffiths, M. C. Jones, K. McLay, R. W. Plumb, M. T. Ross, S. K. Sims, D. L. Willey, Z. Chen, H. Han, L. Kang, M. Godbout, J. C. Wallenburg, P. L'Archevêque, G. Bellemare, K. Saeki, H. Wang, D. An, H. Fu, Q. Li, Z. Wang, R. Wang, A. L. Holden, L. D. Brooks, J. E. McEwen, M. S. Guyer, V. O. Wang, J. L. Peterson, M. Shi, J. Spiegel, L. M. Sung, L. F. Zacharia, F. S. Collins, K. Kennedy, R. Jamieson, J. Stewart; International HapMap Consortium, Genome-wide detection and characterization of positive selection in human populations. *Nature* **449**, 913–918 (2007). [doi:10.1038/nature06250](https://doi.org/10.1038/nature06250) [Medline](#)
48. G. Raposo, D. Tenza, D. M. Murphy, J. F. Berson, M. S. Marks, Distinct protein sorting and localization to premelanosomes, melanosomes, and lysosomes in pigmented melanocytic cells. *J. Cell Biol.* **152**, 809–824 (2001). [doi:10.1083/jcb.152.4.809](https://doi.org/10.1083/jcb.152.4.809) [Medline](#)
49. K. Liu, Y. Jian, X. Sun, C. Yang, Z. Gao, Z. Zhang, X. Liu, Y. Li, J. Xu, Y. Jing, S. Mitani, S. He, C. Yang, Negative regulation of phosphatidylinositol 3-phosphate levels in early-to-late endosome conversion. *J. Cell Biol.* **212**, 181–198 (2016). [doi:10.1083/jcb.201506081](https://doi.org/10.1083/jcb.201506081) [Medline](#)
50. S. K. Mallipattu, S. J. Horne, V. D'Agati, G. Narla, R. Liu, M. A. Frohman, K. Dickman, E. Y. Chen, A. Ma'ayan, A. B. Bialkowska, A. M. Ghaleb, M. O. Nandan, M. K. Jain, I. Daehn, P. Y. Chuang, V. W. Yang, J. C. He, Krüppel-like factor 6 regulates mitochondrial function in the kidney. *J. Clin. Invest.* **125**, 1347–1361 (2015). [doi:10.1172/JCI77084](https://doi.org/10.1172/JCI77084) [Medline](#)
51. V. Delmas, S. Martinozzi, Y. Bourgeois, M. Holzenberger, L. Larue, Cre-mediated recombination in the skin melanocyte lineage. *Genesis* **36**, 73–80 (2003). [doi:10.1002/gene.10197](https://doi.org/10.1002/gene.10197) [Medline](#)

52. B. Nabet, F. M. Ferguson, B. K. A. Seong, M. Kuljanin, A. L. Leggett, M. L. Mohardt, A. Robichaud, A. S. Conway, D. L. Buckley, J. D. Mancias, J. E. Bradner, K. Stegmaier, N. S. Gray, Rapid and direct control of target protein levels with VHL-recruiting dTAG molecules. *Nat. Commun.* **11**, 4687 (2020). [doi:10.1038/s41467-020-18377-w](https://doi.org/10.1038/s41467-020-18377-w) [Medline](#)
53. S. R. Setty, D. Tenza, E. V. Sviderskaya, D. C. Bennett, G. Raposo, M. S. Marks, Cell-specific ATP7A transport sustains copper-dependent tyrosinase activity in melanosomes. *Nature* **454**, 1142–1146 (2008). [doi:10.1038/nature07163](https://doi.org/10.1038/nature07163) [Medline](#)
54. B. J. Bowman, M. E. McCall, R. Baertsch, E. J. Bowman, A model for the proteolipid ring and bafilomycin/concanamycin-binding site in the vacuolar ATPase of *Neurospora crassa*. *J. Biol. Chem.* **281**, 31885–31893 (2006). [doi:10.1016/S0021-9258\(19\)84103-0](https://doi.org/10.1016/S0021-9258(19)84103-0) [Medline](#)
55. P. W. Halcrow, J. D. Geiger, X. Chen, Overcoming Chemoresistance: Altering pH of Cellular Compartments by Chloroquine and Hydroxychloroquine. *Front. Cell Dev. Biol.* **9**, 627639 (2021). [doi:10.3389/fcell.2021.627639](https://doi.org/10.3389/fcell.2021.627639) [Medline](#)
56. S. J. Huh, Y.-L. Chen, S. L. Friedman, J. Liao, H.-J. S. Huang, W. K. Cavenee, G. P. Robertson, KLF6 Gene and early melanoma development in a collagen I-rich extracellular environment. *J. Natl. Cancer Inst.* **102**, 1131–1147 (2010). [doi:10.1093/jnci/djq218](https://doi.org/10.1093/jnci/djq218) [Medline](#)
57. D. Cai, J. Zhao, Q. Sun, Krüppel-like factor 6 in the progression and prognosis of malignant melanoma. *J. Int. Med. Res.* **42**, 184–190 (2014). [doi:10.1177/0300060513499092](https://doi.org/10.1177/0300060513499092) [Medline](#)
58. G. Ito, M. Uchiyama, M. Kondo, S. Mori, N. Usami, O. Maeda, T. Kawabe, Y. Hasegawa, K. Shimokata, Y. Sekido, Krüppel-like factor 6 is frequently down-regulated and induces apoptosis in non-small cell lung cancer cells. *Cancer Res.* **64**, 3838–3843 (2004). [doi:10.1158/0008-5472.CAN-04-0185](https://doi.org/10.1158/0008-5472.CAN-04-0185) [Medline](#)
59. G. Narla, K. E. Heath, H. L. Reeves, D. Li, L. E. Giono, A. C. Kimmelman, M. J. Glucksman, J. Narla, F. J. Eng, A. M. Chan, A. C. Ferrari, J. A. Martignetti, S. L. Friedman, KLF6, a candidate tumor suppressor gene mutated in prostate cancer. *Science* **294**, 2563–2566 (2001). [doi:10.1126/science.1066326](https://doi.org/10.1126/science.1066326) [Medline](#)
60. G. Narla, S. Kremer-Tal, N. Matsumoto, X. Zhao, S. Yao, K. Kelley, M. Tarocchi, S. L. Friedman, In vivo regulation of p21 by the Krüppel-like factor 6 tumor-suppressor gene in mouse liver and human hepatocellular carcinoma. *Oncogene* **26**, 4428–4434 (2007). [doi:10.1038/sj.onc.1210223](https://doi.org/10.1038/sj.onc.1210223) [Medline](#)
61. B. Zhang, D. D. Guo, J. Y. Zheng, Y. A. Wu, Expression of KLF6-SV2 in colorectal cancer and its impact on proliferation and apoptosis. *Eur. J. Cancer Prev.* **27**, 20–26 (2018). [doi:10.1097/CEJ.0000000000000410](https://doi.org/10.1097/CEJ.0000000000000410) [Medline](#)
62. K. Double, W. Maruyama, M. Naoi, M. Gerlach, P. Riederer, in *Melanins and Melanosomes*, J. Borovansky, P. A. Riley, Eds. (Wiley-Blackwell, 2011), pp. 225–246.
63. Y. Yamaguchi, V. J. Hearing, Melanocytes and their diseases. *Cold Spring Harb. Perspect. Med.* **4**, a017046 (2014). [doi:10.1101/cshperspect.a017046](https://doi.org/10.1101/cshperspect.a017046) [Medline](#)

64. V. K. Bajpai *et al.*, A genome-wide genetic screen uncovers novel determinants of human pigmentation, Zenodo (2023); <https://doi.org/10.5281/zenodo.7991815>.
65. V. K. Bajpai, P. Mistryotis, Y. H. Loh, G. Q. Daley, S. T. Andreadis, Functional vascular smooth muscle cells derived from human induced pluripotent stem cells via mesenchymal stem cell intermediates. *Cardiovasc. Res.* **96**, 391–400 (2012). [doi:10.1093/cvr/cvs253](https://doi.org/10.1093/cvr/cvs253) [Medline](#)
66. V. K. Bajpai, L. Kerosuo, G. Tseropoulos, K. A. Cummings, X. Wang, P. Lei, B. Liu, S. Liu, G. K. Popescu, M. E. Bronner, S. T. Andreadis, Reprogramming Postnatal Human Epidermal Keratinocytes Toward Functional Neural Crest Fates. *Stem Cells* **35**, 1402–1415 (2017). [doi:10.1002/stem.2583](https://doi.org/10.1002/stem.2583) [Medline](#)
67. S. Vaidyanathan, A. A. Salahudeen, Z. M. Sellers, D. T. Bravo, S. S. Choi, A. Batish, W. Le, R. Baik, S. de la O, M. P. Kaushik, N. Galper, C. M. Lee, C. A. Teran, J. H. Yoo, G. Bao, E. H. Chang, Z. M. Patel, P. H. Hwang, J. J. Wine, C. E. Milla, T. J. Desai, J. V. Nayak, C. J. Kuo, M. H. Porteus, High-Efficiency, Selection-free Gene Repair in Airway Stem Cells from Cystic Fibrosis Patients Rescues CFTR Function in Differentiated Epithelia. *Cell Stem Cell* **26**, 161–171.e4 (2020). [doi:10.1016/j.stem.2019.11.002](https://doi.org/10.1016/j.stem.2019.11.002) [Medline](#)
68. J. Hosoi, E. Abe, T. Suda, T. Kuroki, Regulation of melanin synthesis of B16 mouse melanoma cells by 1 alpha, 25-dihydroxyvitamin D3 and retinoic acid. *Cancer Res.* **45**, 1474–1478 (1985). [Medline](#)
69. N. Kollias, *The Spectroscopy of Human Melanin Pigmentation in Melanin: Its Role in Human Photoprotection* (Valdenmar Publishing Co., 1995).
70. S. Abounit, L. Bousset, F. Loria, S. Zhu, F. de Chaumont, L. Pieri, J.-C. Olivo-Marin, R. Melki, C. Zurzolo, Tunneling nanotubes spread fibrillar  $\alpha$ -synuclein by intercellular trafficking of lysosomes. *EMBO J.* **35**, 2120–2138 (2016). [doi:10.15252/embj.201593411](https://doi.org/10.15252/embj.201593411) [Medline](#)
71. S. Bolte, F. P. Cordelières, A guided tour into subcellular colocalization analysis in light microscopy. *J. Microsc.* **224**, 213–232 (2006). [doi:10.1111/j.1365-2818.2006.01706.x](https://doi.org/10.1111/j.1365-2818.2006.01706.x) [Medline](#)
72. E. M. M. Manders, F. J. Verbeek, J. A. Aten, Measurement of co-localization of objects in dual-colour confocal images. *J. Microsc.* **169**, 375–382 (1993). [doi:10.1111/j.1365-2818.1993.tb03313.x](https://doi.org/10.1111/j.1365-2818.1993.tb03313.x) [Medline](#)
73. E. Eden, R. Navon, I. Steinfeld, D. Lipson, Z. Yakhini, GOrilla: A tool for discovery and visualization of enriched GO terms in ranked gene lists. *BMC Bioinformatics* **10**, 48 (2009). [doi:10.1186/1471-2105-10-48](https://doi.org/10.1186/1471-2105-10-48) [Medline](#)
74. F. Supek, M. Bošnjak, N. Škunca, T. Šmuc, REVIGO summarizes and visualizes long lists of gene ontology terms. *PLOS ONE* **6**, e21800 (2011). [doi:10.1371/journal.pone.0021800](https://doi.org/10.1371/journal.pone.0021800) [Medline](#)
75. N. Sinnott-Armstrong, S. Naqvi, M. Rivas, J. K. Pritchard, GWAS of three molecular traits highlights core genes and pathways alongside a highly polygenic background. *eLife* **10**, e58615 (2021). [doi:10.7554/eLife.58615](https://doi.org/10.7554/eLife.58615) [Medline](#)



76. 1000 Genomes Project Consortium, A global reference for human genetic variation. *Nature* **526**, 68–74 (2015). [doi:10.1038/nature15393](https://doi.org/10.1038/nature15393) [Medline](#)
77. P. Danecek, A. Auton, G. Abecasis, C. A. Albers, E. Banks, M. A. DePristo, R. E. Handsaker, G. Lunter, G. T. Marth, S. T. Sherry, G. McVean, R. Durbin; 1000 Genomes Project Analysis Group, The variant call format and VCFtools. *Bioinformatics* **27**, 2156–2158 (2011). [doi:10.1093/bioinformatics/btr330](https://doi.org/10.1093/bioinformatics/btr330) [Medline](#)
78. A. Frankish, M. Diekhans, A.-M. Ferreira, R. Johnson, I. Jungreis, J. Loveland, J. M. Mudge, C. Sisu, J. Wright, J. Armstrong, I. Barnes, A. Berry, A. Bignell, S. Carbonell Sala, J. Chrast, F. Cunningham, T. Di Domenico, S. Donaldson, I. T. Fiddes, C. García Girón, J. M. Gonzalez, T. Grego, M. Hardy, T. Hourlier, T. Hunt, O. G. Izuogu, J. Lagarde, F. J. Martin, L. Martínez, S. Mohanan, P. Muir, F. C. P. Navarro, A. Parker, B. Pei, F. Pozo, M. Ruffier, B. M. Schmitt, E. Stapleton, M.-M. Suner, I. Sycheva, B. Uszczyńska-Ratajczak, J. Xu, A. Yates, D. Zerbino, Y. Zhang, B. Aken, J. S. Choudhary, M. Gerstein, R. Guigó, T. J. P. Hubbard, M. Kellis, B. Paten, A. Reymond, M. L. Tress, P. Flicek, GENCODE reference annotation for the human and mouse genomes. *Nucleic Acids Res.* **47**, D766–D773 (2019). [doi:10.1093/nar/gky955](https://doi.org/10.1093/nar/gky955) [Medline](#)
79. G. Bhatia, N. Patterson, S. Sankararaman, A. L. Price, Estimating and interpreting FST: The impact of rare variants. *Genome Res.* **23**, 1514–1521 (2013). [doi:10.1101/gr.154831.113](https://doi.org/10.1101/gr.154831.113) [Medline](#)
